# Supplementary material
Source: PubMed Central journal article supplement (PMC5462862)
Supplement: NIHMS858768-supplement-2.pdf [file NIHMS858768-supplement-2.pdf]

## SUPPLEMENTARY FIGURES AND LEGENDS

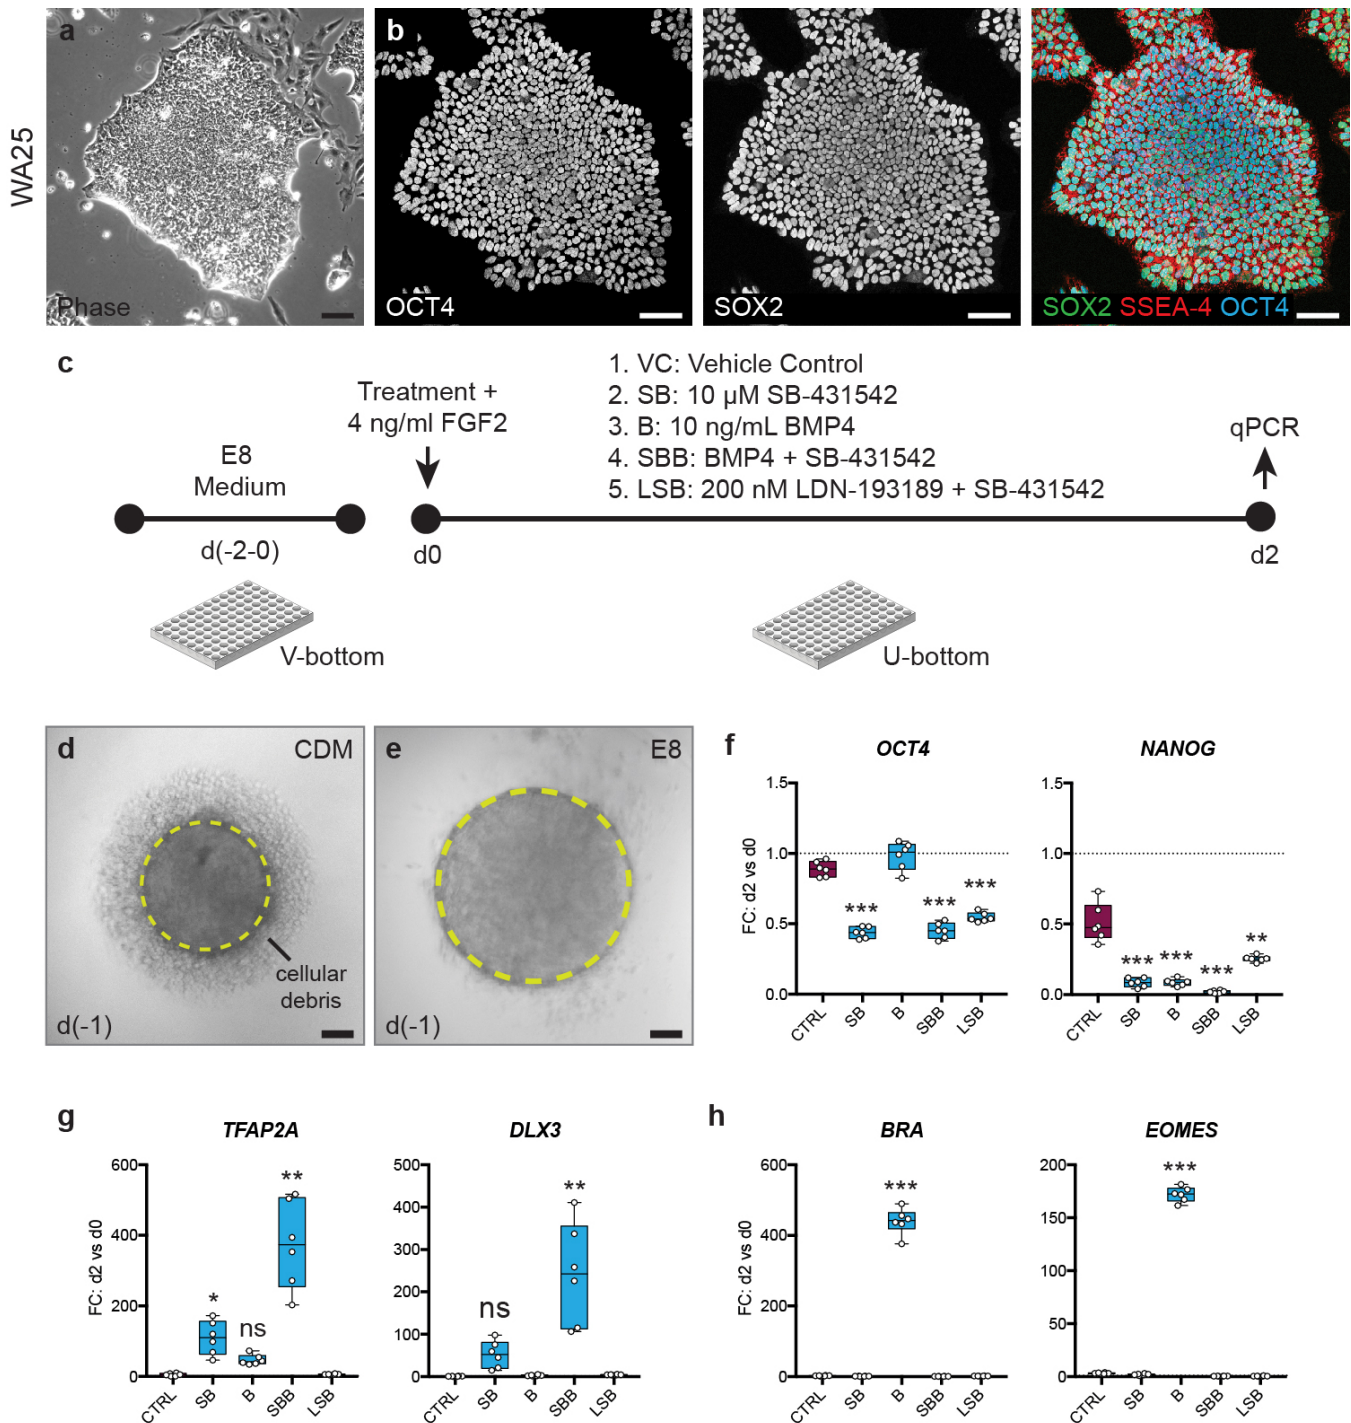

**Supplementary Figure 1: Undifferentiated WA25 hESCs, cell aggregation, and initial non-neural ectoderm differentiation analysis.** **a, b**, WA25 cells maintained on Vitronectin-N-coated plates in E8 medium express markers of primed pluripotent stem cells. **c**, Overview of differentiation strategy and experimental conditions. **d, e**, Aggregation of single-celled hESCs in E8 + 20  $\mu$ M Y-27632 produced less cellular debris than aggregation in CDM + 20  $\mu$ M Y-27632. **f**, Relative to undifferentiated cells, pluripotency markers were significantly down-regulated by day 2 in all conditions except vehicle control. **g**, The non-neural markers *TFAP2A* and *DLX3* were upregulated in SB and SBB conditions. **h**, The mesendoderm markers *BRA* and *EOMES* were upregulated by BMP4 (B) treatment. Gene expression was normalized to d0 aggregates. For statistical tests treatment values were compared to control (CTRL) values;  $n = 3$  biological samples, 2 technical replicates; \* $P < 0.05$ , \*\* $P < 0.01$ , \*\*\* $P < 0.001$ , ns = not significant; error bars are max/min. Scale bars, 100  $\mu$ m (**d, e**), 25  $\mu$ m (**a, b**).

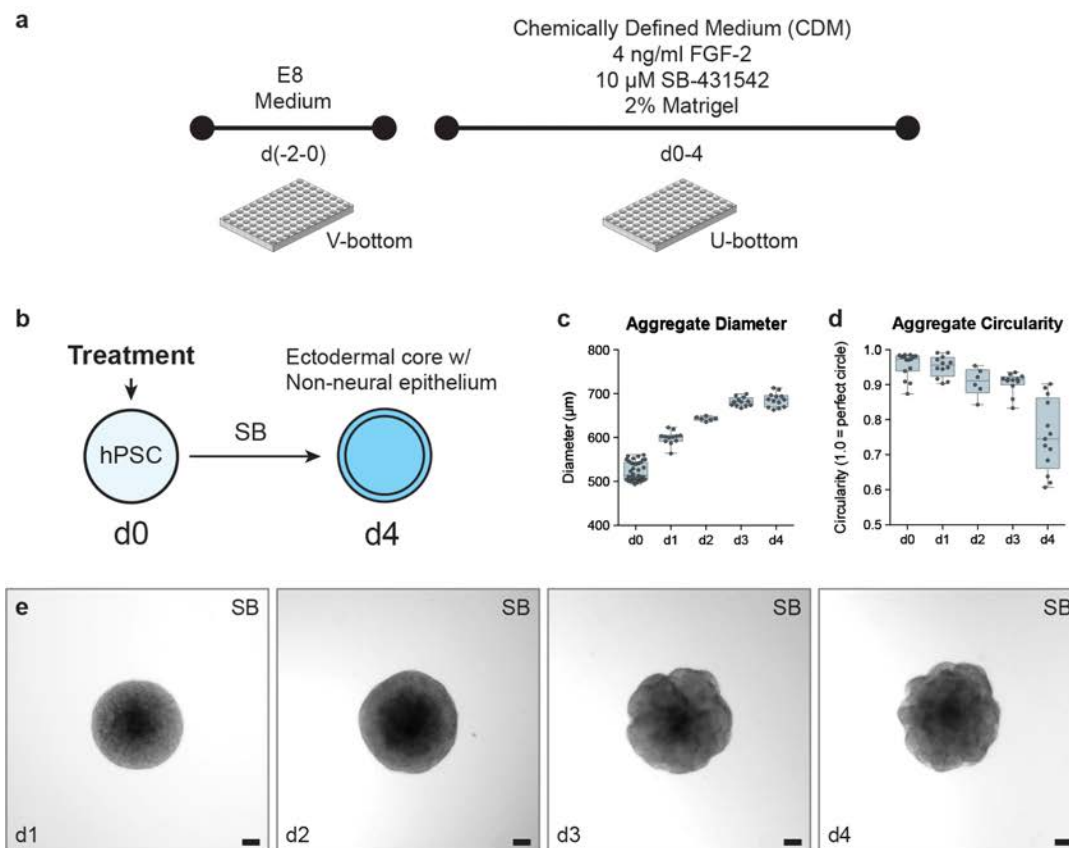

Loss of OCT4 expression in the core and TFAP2A expression in the surface epithelium

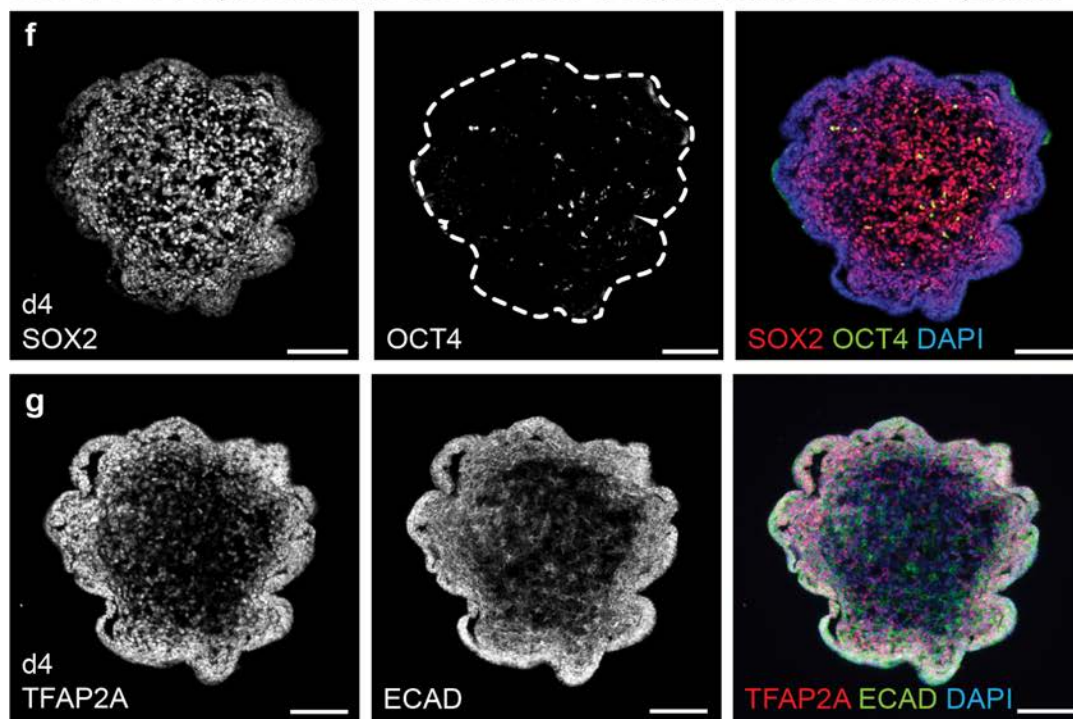

**Supplementary Figure 2: Non-neural induction using WA25 hESCs.** **a, b**, Overview of differentiation strategy. **c-e**, Aggregate diameter (**c**) and circularity (**d**) over time in culture. The circularity of the aggregates decreases overtime as the outer epithelium crumples (**e**). **f, g**, Representative day 4 aggregate showing a nearly complete lack of OCT4-expressing cells, SOX2-expressing cells in the core, and TFAP2/ECAD-expressing cells in the outer-core and epithelium. Error bars are max/min. Scale bars, 100  $\mu$ m.

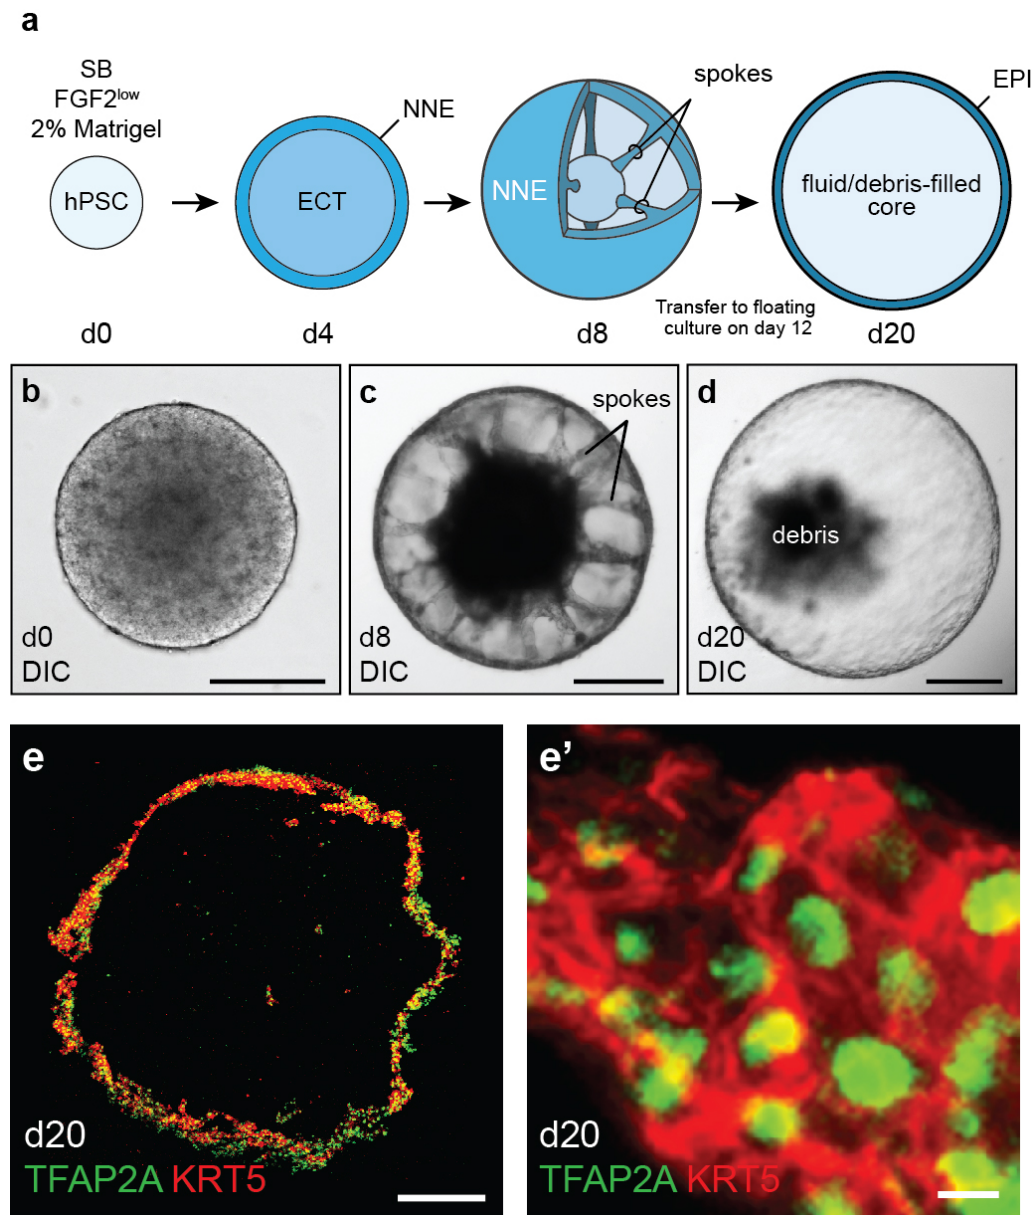

**Supplementary Figure 3: SB-treated aggregates generate keratinocytes.** **a**, Overview of non-neural and keratinocyte induction process. **b-d**, In 3D culture, non-neural ectoderm induction is accompanied by characteristic morphological changes. By days 6-8, the epithelium separates from the core, forming a translucent sphere (**c**). The epithelium remains connected to the core via spoke-like structures (**a**, **c**). After 20 days, spokes from the core are absent, and the epithelial sphere is typically filled with cellular debris (**d**). **e**, The day 20 epithelium contains TFAP2A<sup>+</sup> KRT5<sup>+</sup> cells, indicative of epidermal keratinocytes. Scale bars, 250  $\mu$ m (**b-d**), 100  $\mu$ m (**e**), 5  $\mu$ m (**e'**).

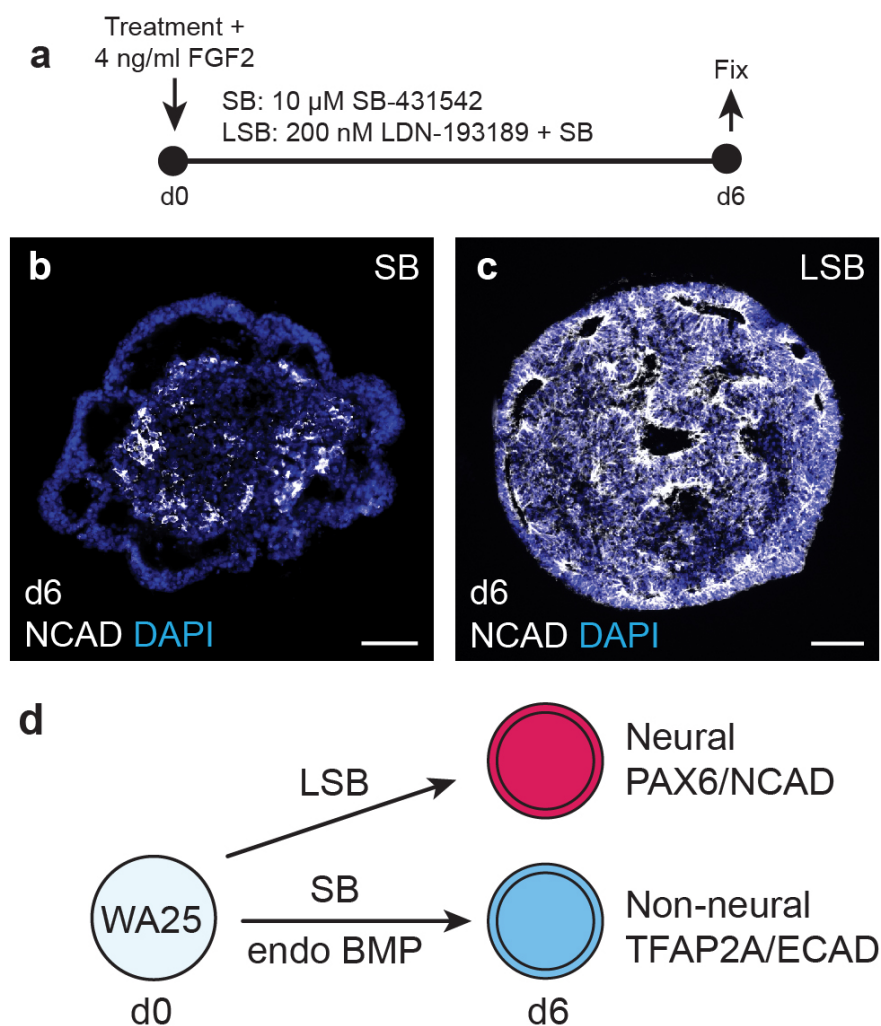

**Supplementary Figure 4: Non-neural ectoderm induction in SB-treated WA25 aggregates is due to endogenous BMP signaling.** **a**, Overview of experiment to test whether endogenous BMP signaling influence non-neural induction. **b-d**, LSB treatment leads to NCAD expression throughout the aggregates. Note that a subpopulation of NCAD<sup>+</sup> PAX6<sup>+</sup> cells (**Fig. 1e**) do appear in the core of SB treated aggregates. Scale bars, 50  $\mu$ m.

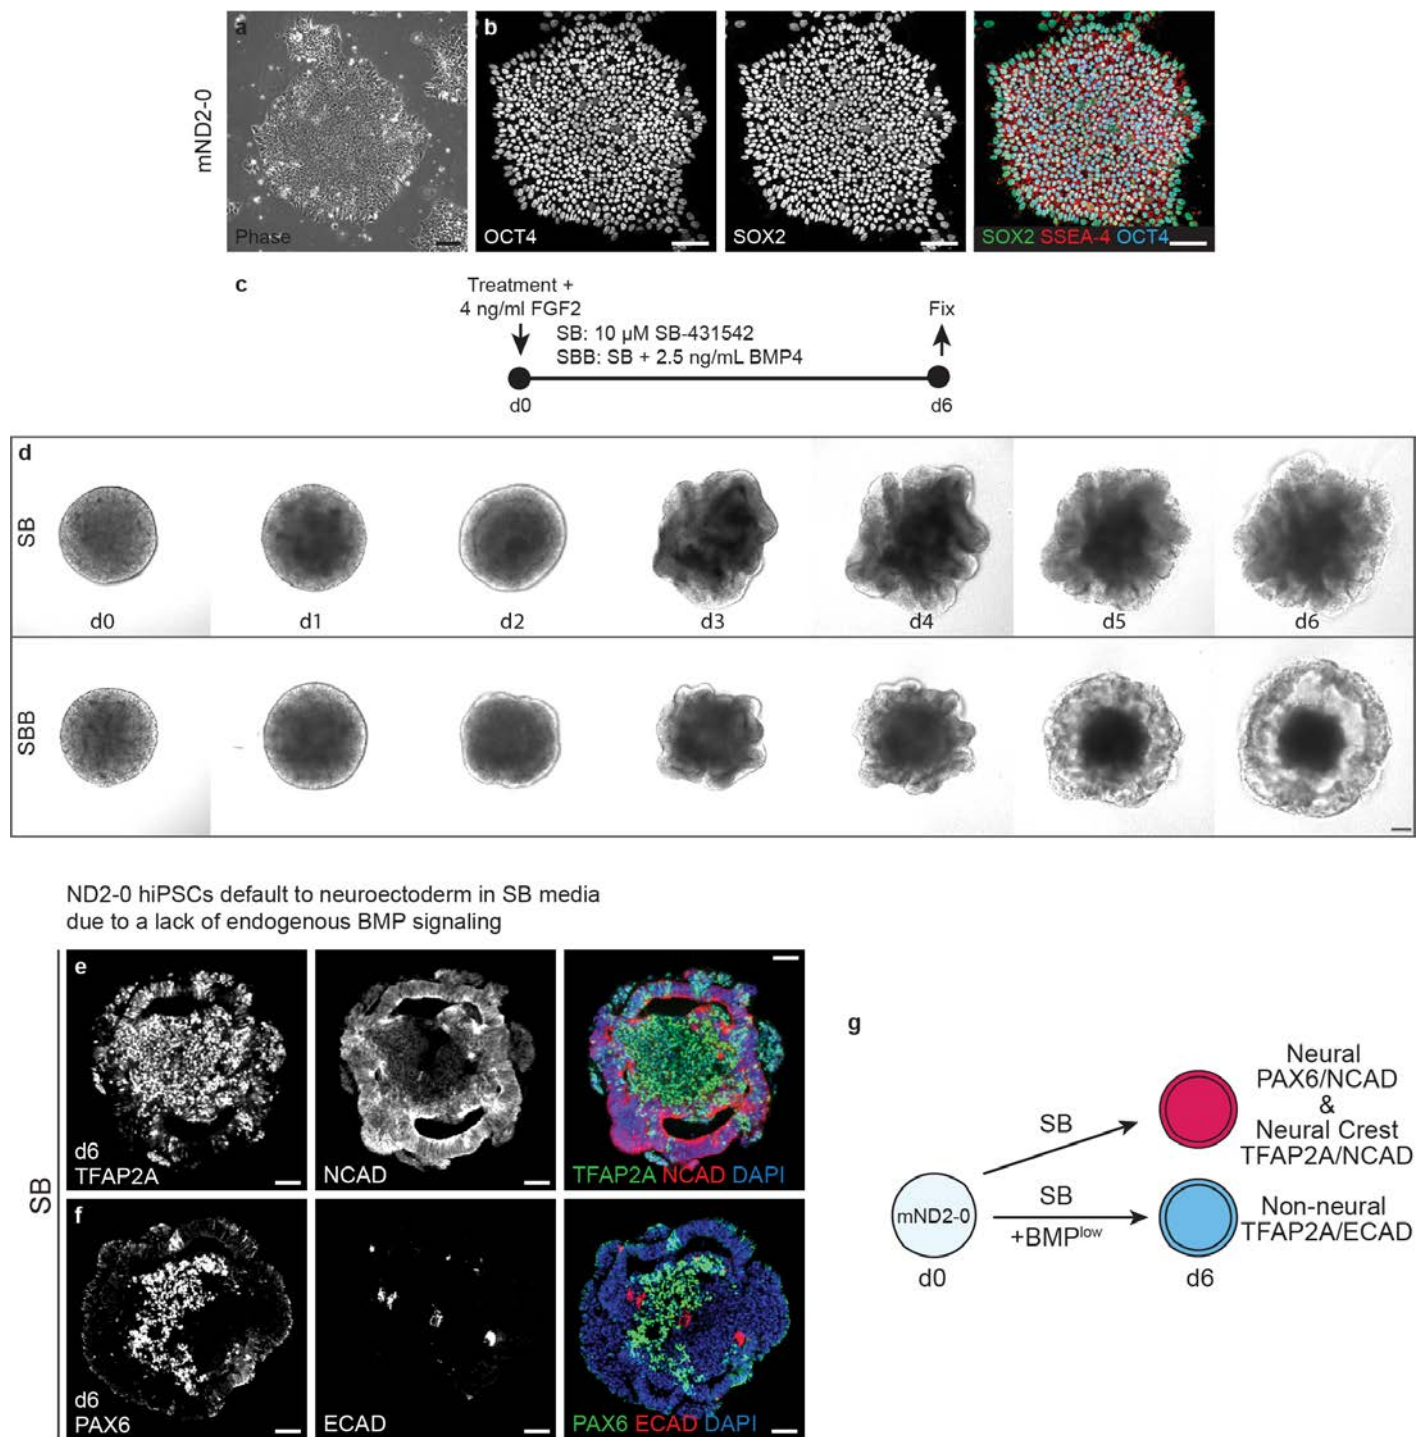

**Supplementary Figure 5: Optimization of non-neural ectoderm induction with mND2-0 iPSCs.** **a, b**, mND2-0 cells maintained on Vitronectin-N-coated plates in E8 medium express markers of primed pluripotent stem cells. **c**, Overview of differentiation strategy and experimental conditions. Other BMP concentrations were tested in a preliminary experiment (1.25, 2.5, 5, 10, 20, 40 ng/ml), and 2.5 ng/ml was selected as the minimum concentration that produced the morphological changes (i.e. translucent sphere) seen in SB-treated mND2-0 cells (see **Supplementary Fig. 3c**). **d**, Representative images of SB- or SBB-treated aggregates between days 0-6. **e, f**, SB-treated aggregates generate PAX6<sup>+</sup> NCAD<sup>+</sup> epithelia, TFAP2<sup>+</sup> migratory cells, and few ECAD<sup>+</sup> cells by day 6, suggesting a heterogeneous mix of neuroectoderm and neural crest cells. **g**, Endogenous BMP signaling is insufficient for non-neural conversion in mND2-0 iPSCs; thus, additional BMP4 is necessary. Scale bars, 100  $\mu$ m (**d**), 25  $\mu$ m (**a, b, e, f**).

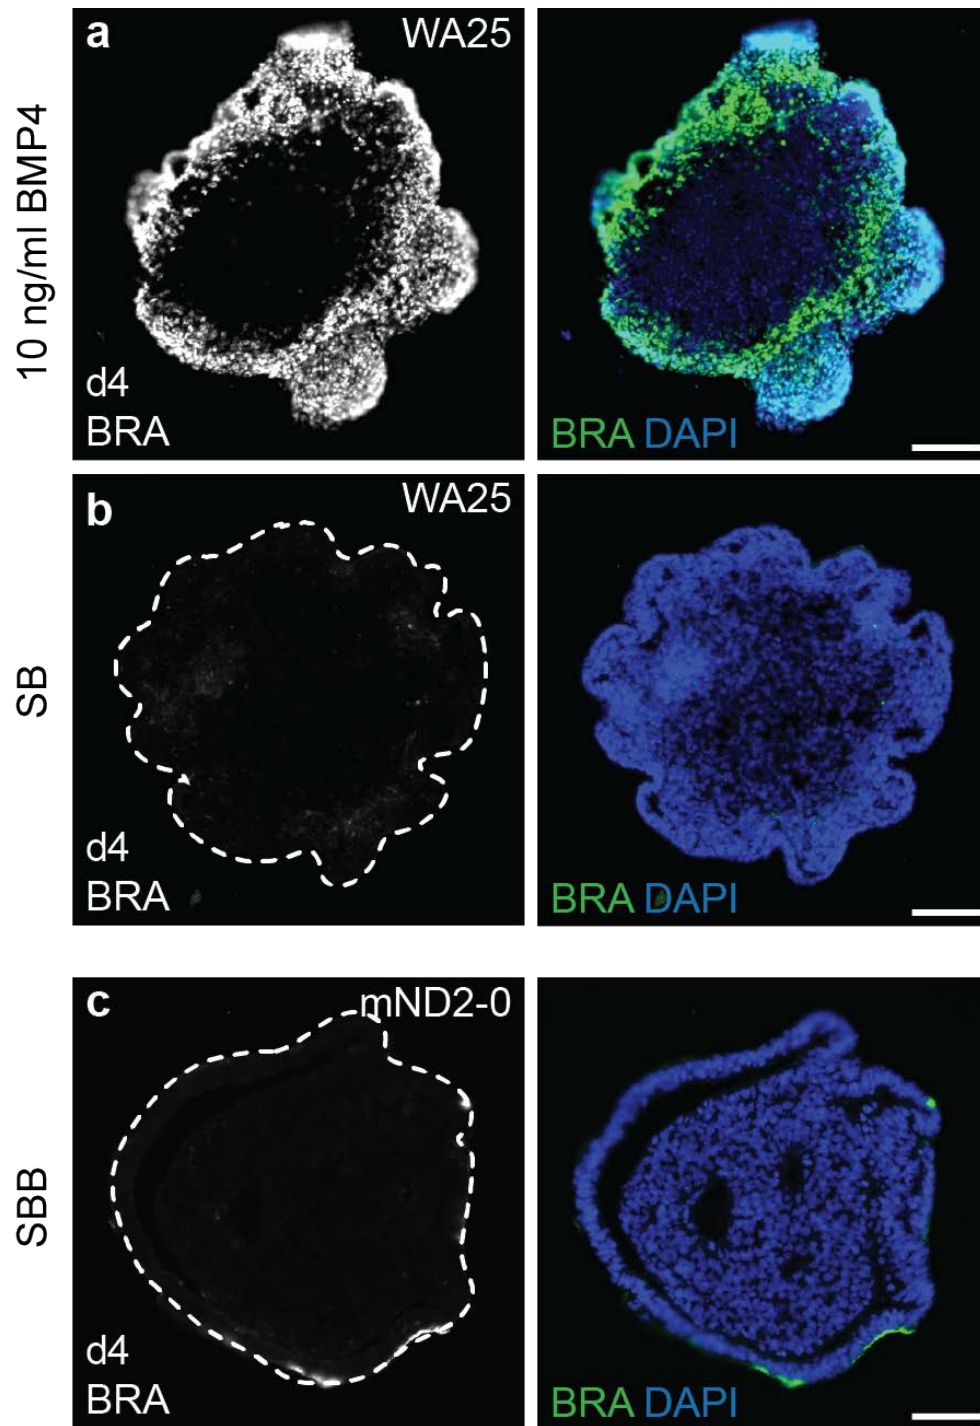

**Supplementary Figure 6: Non-neural ectoderm induction occurs without off-target induction of mesendodermal cells.** Representative Brachyury (BRA) IHC in day 4 aggregates treated with 10 ng/ml BMP4 (a), 10  $\mu\text{M}$  SB (b), and 10  $\mu\text{M}$  SB + 2.5 ng/ml BMP4 (c) on day 0. Scale bars, 50  $\mu\text{m}$ .

## WA25 hESCs

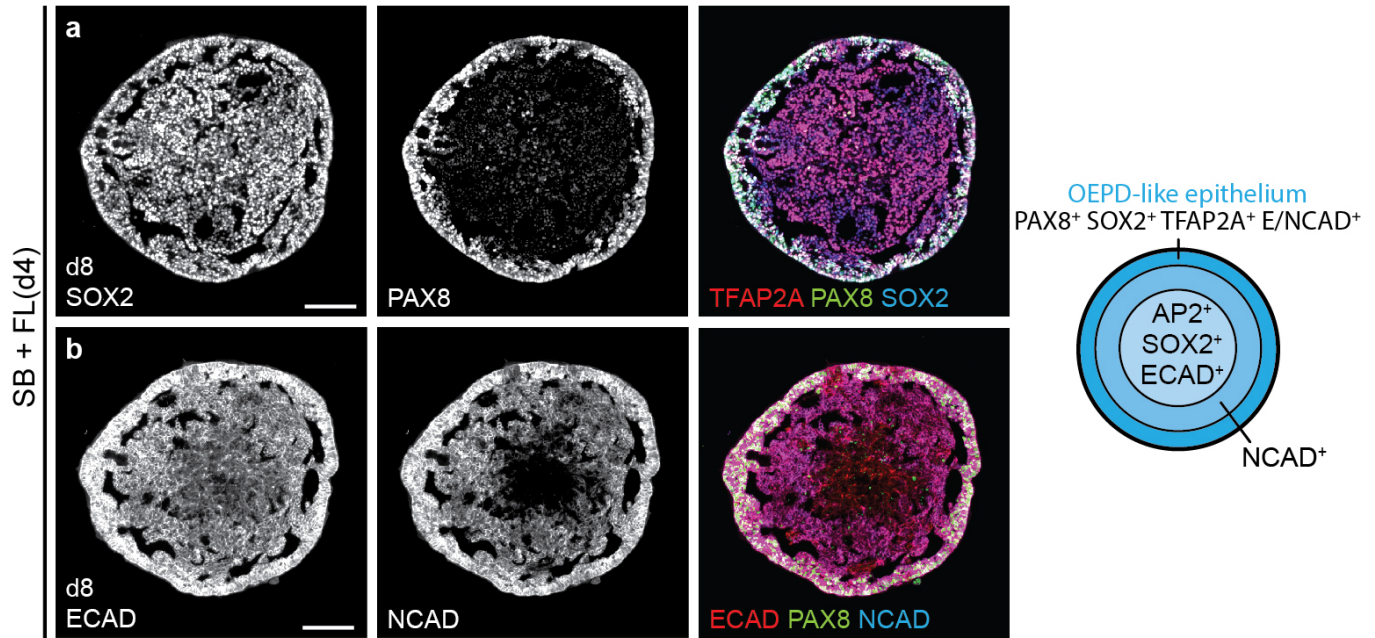

## mND2-0 hiPSCs

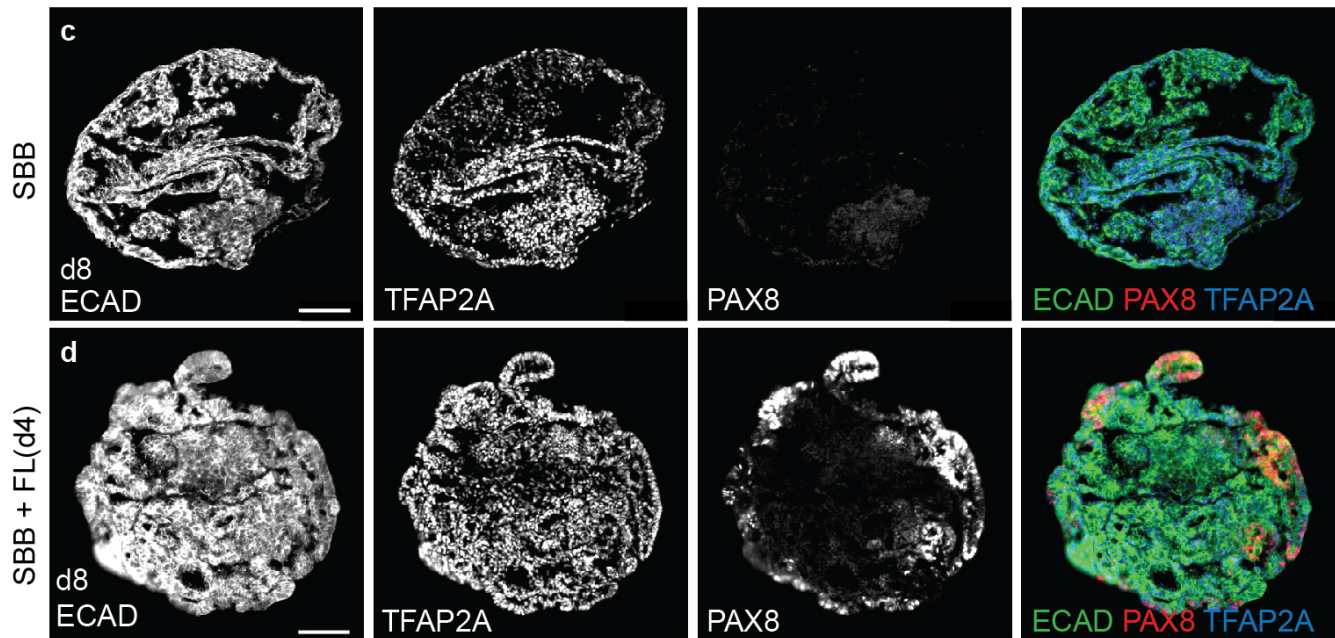

**Supplementary Figure 7: Induction of OEPD-like epithelium in WA25 hESC and mND2-0 iPSC aggregates by FGF-2 and LDN treatment.** **a, b,** SOX2, TFAP2, and ECAD are expressed throughout SB-treated WA25 aggregates on day 8 following FL treatment on day 4. PAX8 expression is restricted to the outer-epithelium. A unique characteristic of the epibranchial and otic placodes is the co-expression of ECAD and NCAD. Here, NCAD expression was observed throughout the aggregate, except for the interior-most core. **c, d,** iPSCs treated with SBB never express PAX8. FL treatment on day 4 induces a thicker outer-epithelium morphology and expression of PAX8. ECAD and TFAP2 are expressed throughout the SBB+FL(d4)-treated iPSC aggregates. Scale bars, 100  $\mu$ m.

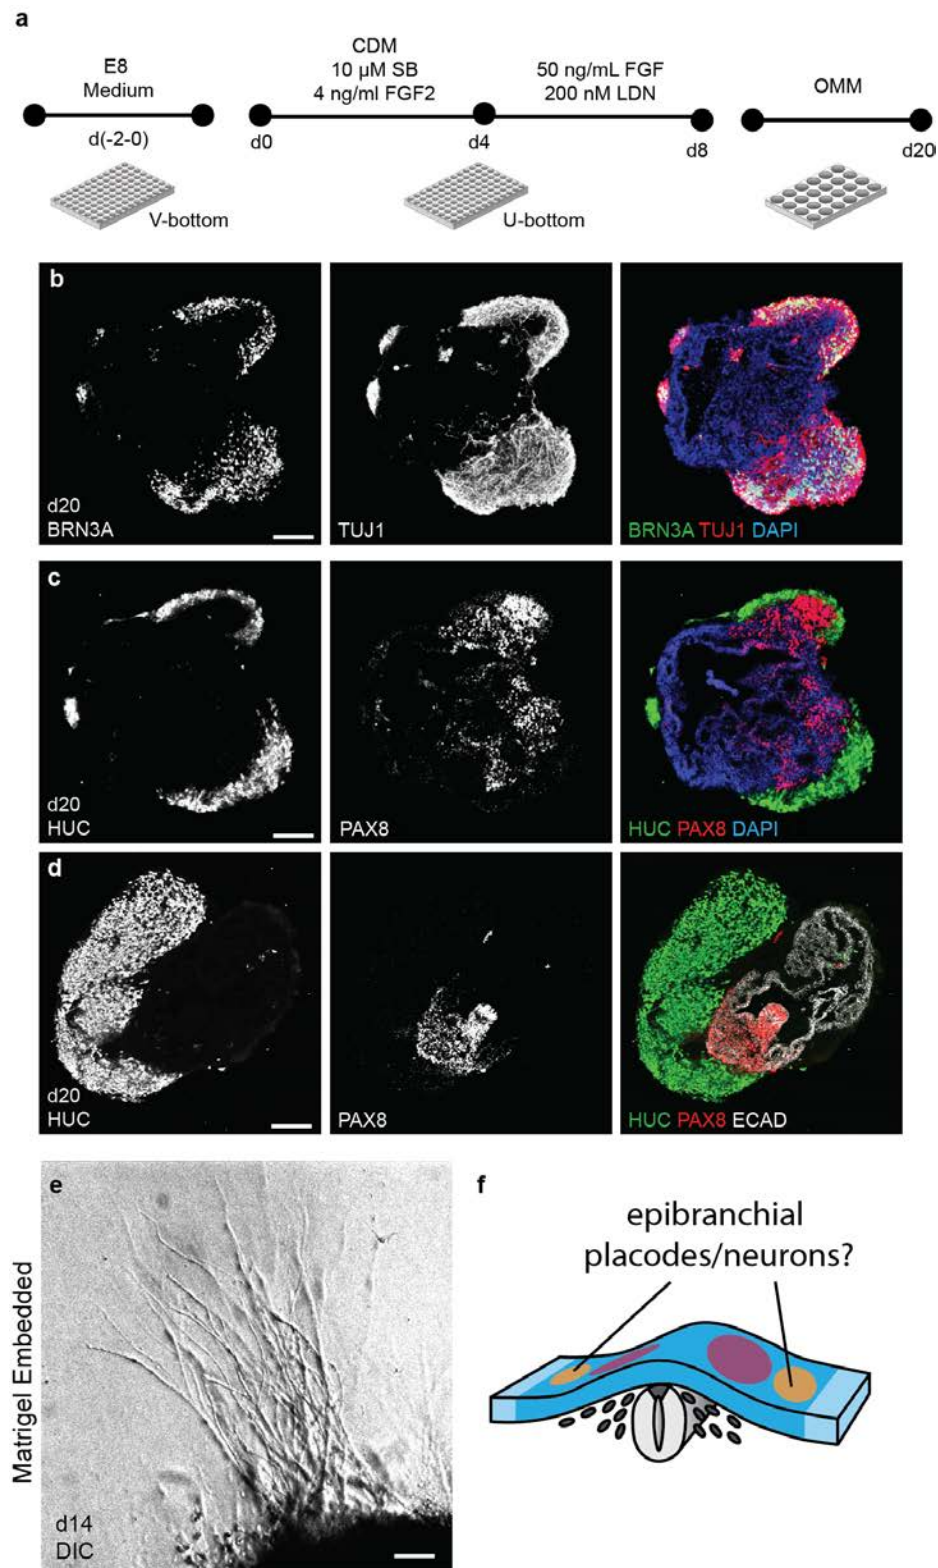

**Supplementary Figure 8: OEPD induced aggregates spontaneously generate sensory-like neurons in a minimal medium floating culture.** **a**, Overview of the experiment. SBFL-treated aggregates were transferred to OMM on day 8 of differentiation. **b-d**, On day 20, the aggregates are composed of patches of BRN3A<sup>+</sup> TUJ1<sup>+</sup> HUC<sup>+</sup> neurons surrounding a ECAD<sup>+</sup> epithelium. Neuronal patches were typically associated with PAX8<sup>+</sup> epithelium. When aggregates were plated in Matrigel droplets they produced neurite outgrowths (**e**). **f**, BRN3A<sup>+</sup> neurons emerging from a PAX8<sup>+</sup> ECAD<sup>+</sup> epithelium is consistent with epibranchial placode neurogenesis; however, these data *do not* directly establish the PAX8<sup>+</sup> ECAD<sup>+</sup> epithelium as the origin of the sensory neurons. Scale bars, 100  $\mu$ m (**b**, **c**, **d**), 50  $\mu$ m (**e**).

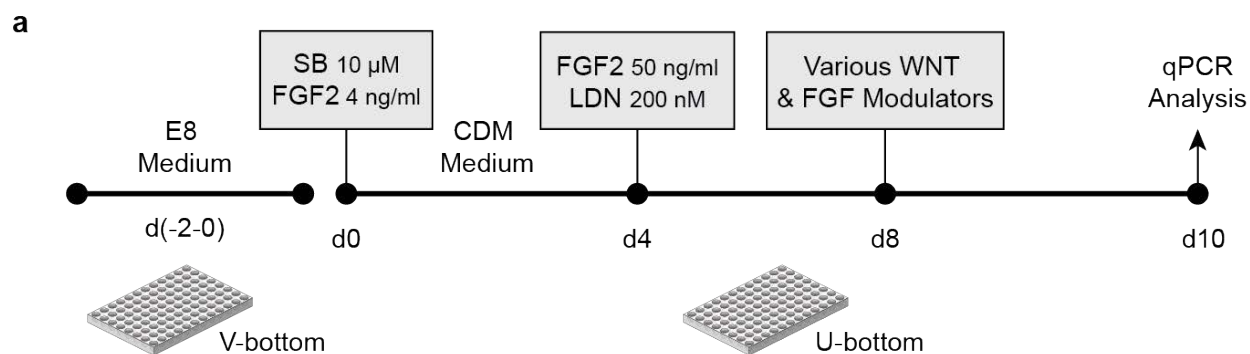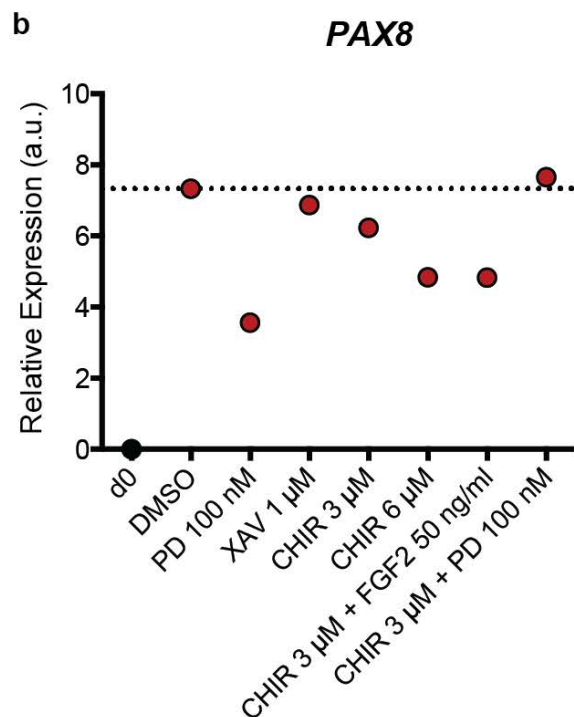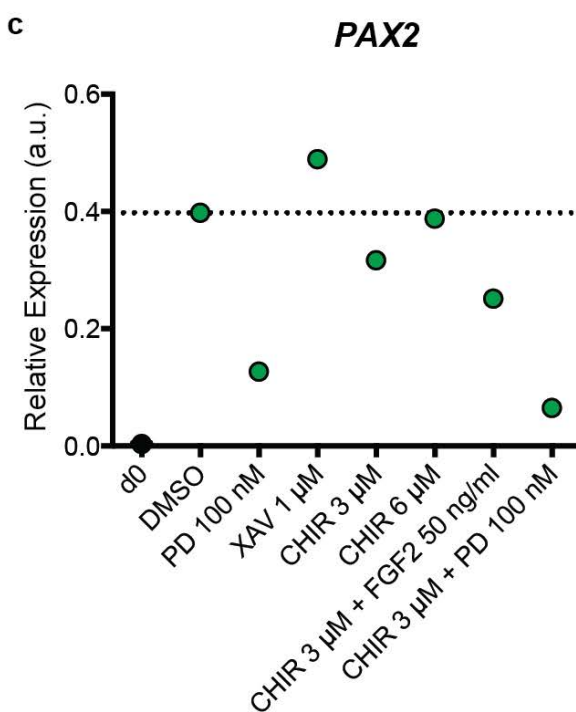

**Supplementary Figure 9: WNT and FGF signaling modulation and PAX8/PAX2 expression during days 8-10.** **a**, These qPCR data are representative of one exploratory experiment focused on identifying signaling modulators that could increase PAX2 expression following OEPD induction. **b**, **c**, FGF inhibition using, PD-173074 likely inhibits PAX2 expression, as would be expected based on developmental studies<sup>1</sup>. By contrast, the WNT inhibitor, XAV939, and WNT agonist, CHIR99021, only had a modest positive or negative impact on PAX2 expression compared to a DMSO controls. Based on these results and extensive immunostaining for PAX2 expression, we reasoned that the OEPD epithelium may require more time before it will be responsive to otic inductive cues. Thus, we changed strategies by lengthening the initial culture phase to 12 days (with addition of fresh media on day 8) and testing the effect of transitioning the aggregates to Matrigel droplets.

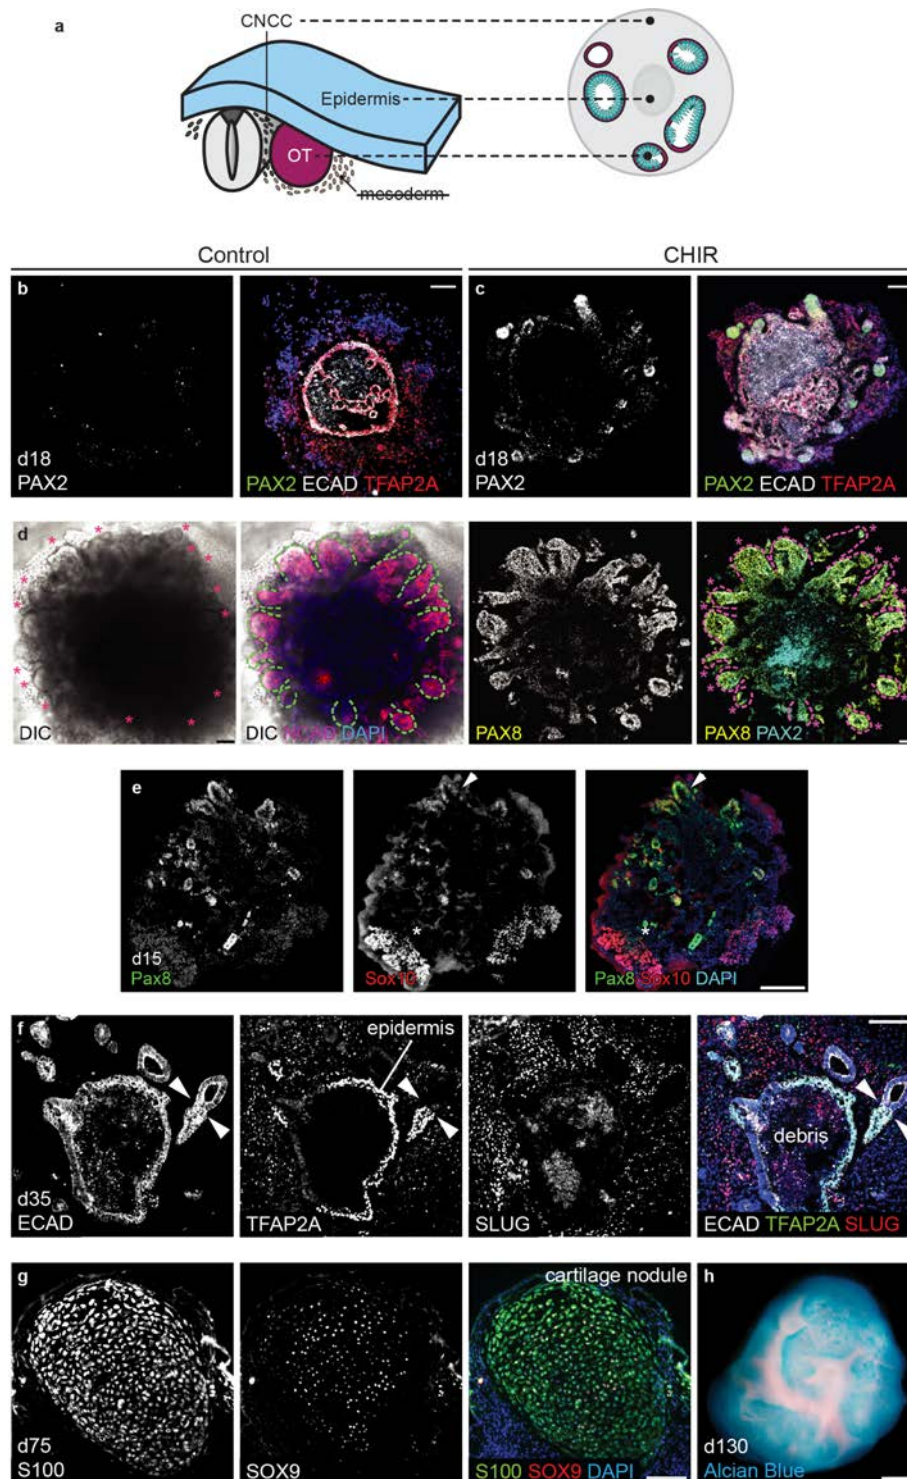

**Supplementary Figure 10: Otic vesicles evaginate into a mesenchyme of cranial neural crest (CNC)-like cells.** **a**, During development, the otic vesicle is surrounded by mesenchymal cells—of both CNC and mesodermal origin—with an overlying epidermis. **b, c**, On day 18, CHIR treated aggregates display PAX2+ ECAD+ pit/vesicle-like structures (**c**) that do not appear in control (DMSO) treated samples (**b**). TFAP2A+ migrate radially away from the aggregate in both conditions. **d**, Correlation of otic pit-like structures (asterisks) observed under DIC imaging with cryosections immunostained for NCAD, PAX8, and PAX2. **e**, In CHIR-treated samples, SOX10 is expressed in the otic pit epithelia (arrowhead) as well as in a subset of the migratory cells (asterisks), suggesting the presence of CNC-like cells. **f**, At day 35, the mesenchymal cell layer has thickened relative to day 18 and contains cells expressing TFAP2A and SLUG (**c**) and some otic vesicles have detached from the core epidermis, while others remain attached (arrowheads). **g, h**, At days 75-130, the mesenchyme contains multiple cartilage nodules that stain positive for Alcian blue, S100, and SOX9. Scale bars, 250 μm (**h**), 100 μm (**b-g**).

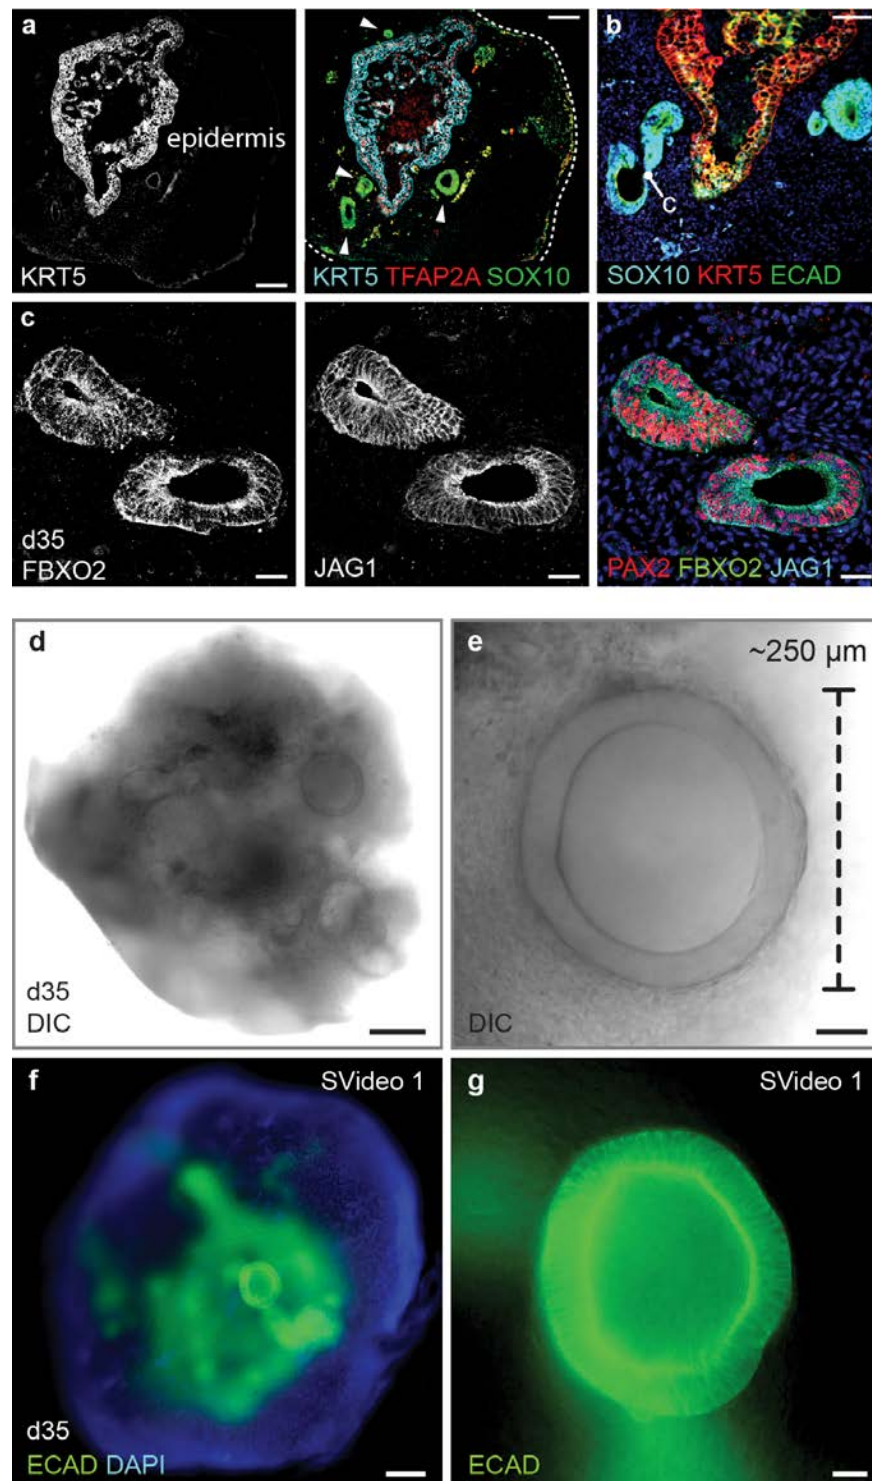

**Supplementary Figure 11: Otic vesicles evaginate radially around a core epithelium of epidermal keratinocytes.** **a-c**, Serial sections through a day 35 aggregate showing the internal organization of epidermal and otic vesicle epithelia. KRT5 expression is restricted to the epidermis, whereas ECAD is expressed in both epidermis and otic vesicle epithelial cells. Arrowheads label SOX10<sup>+</sup> otic vesicles in **(a)**. Note the CNC-like SOX10<sup>+</sup> TFAP2<sup>-</sup> and SOX10<sup>+</sup> TFAP2<sup>+</sup> cells in the mesenchymal layer of the aggregate. The pair of vesicles highlighted in panel **(c)** are labeled, at lower magnification and different orientation, in panel **(b)**. The vesicles seen in **(c)** were shown to co-express the otic vesicle markers SOX10, PAX2, FBXO2, JAG1, and ECAD. **d-g**, A day 35 aggregate that was wholemount immunostained for ECAD to reveal the epidermal core and surrounding otic vesicles. See **Supplementary Video 1** for additional analysis of this specimen. Scale bars, 250 μm (**d, f**), 100 μm (**a, b**), 25 μm (**c, e, g**).

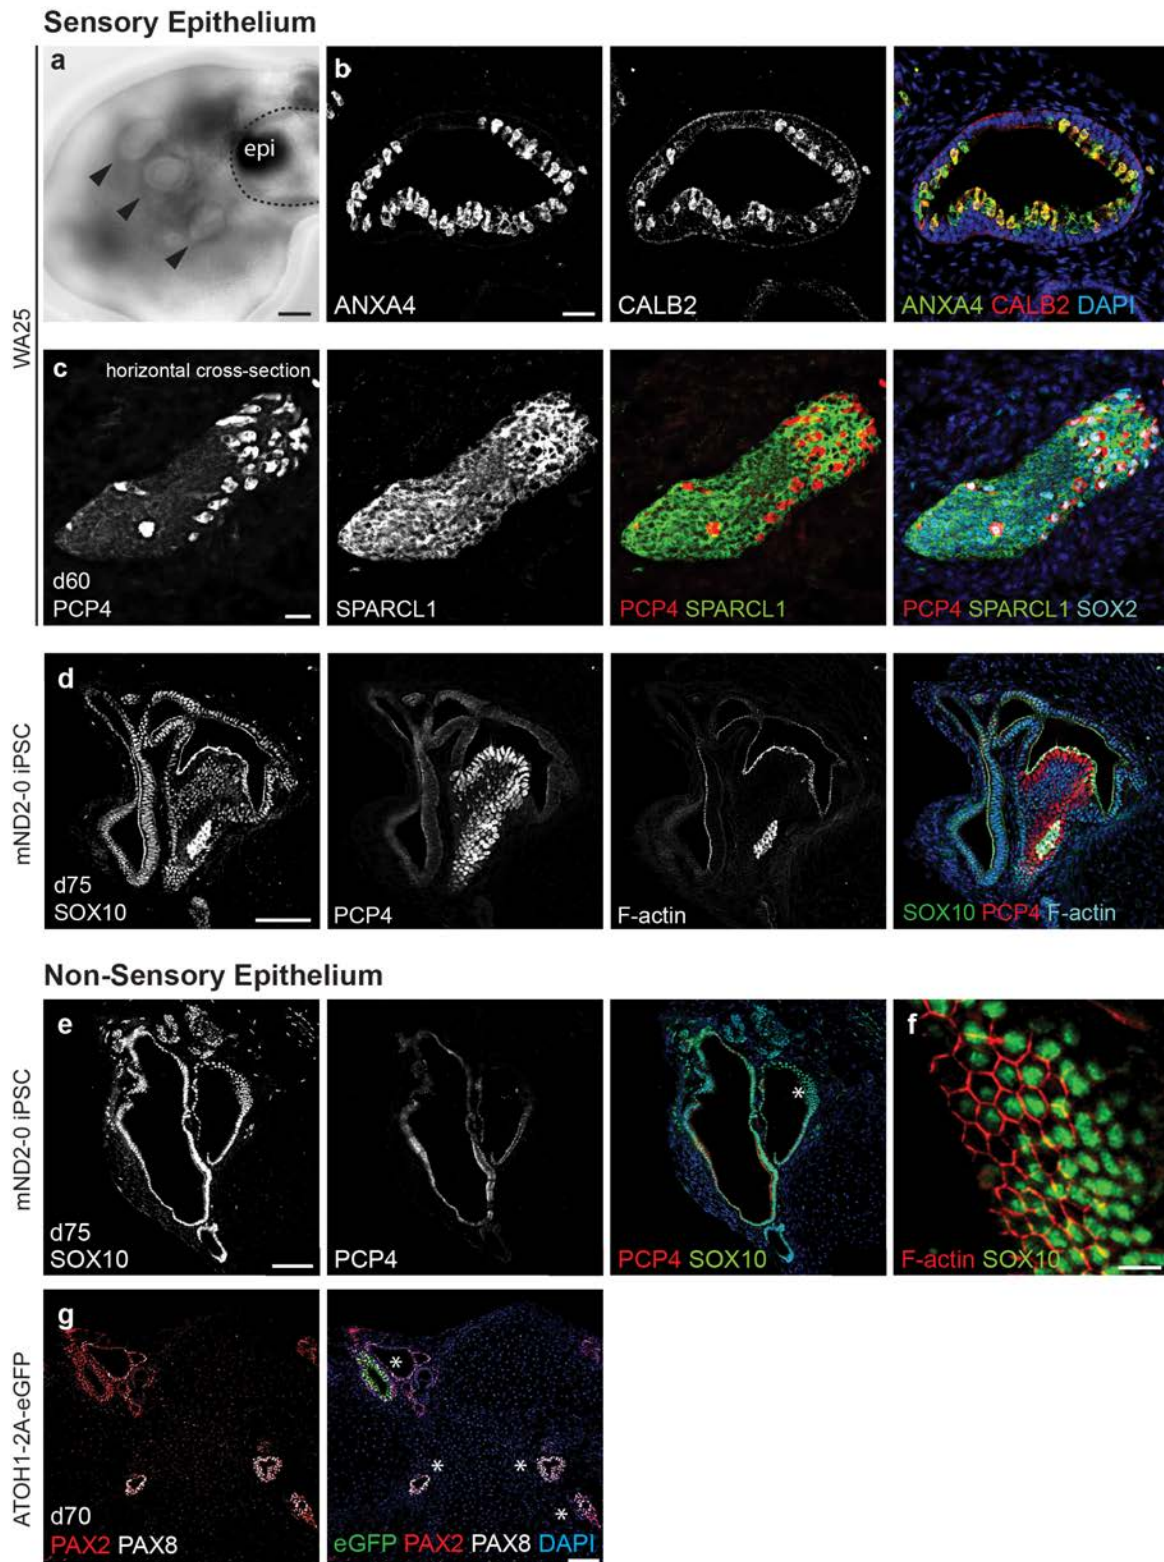

**Supplementary Figure 12: Inner ear organoids generate vestibular-like sensory epithelia.** **a**, Day 48 aggregate with three visible inner ear organoids (arrowheads). Note that this specimen was derived from a separate experiment than the specimen seen in **Fig. 2j**. **b**, Organoid hair cells express the type II vestibular and inner cochlear hair cell marker CALB2. **c**, Cross-section through a sensory epithelium showing expression of SPARCL1 throughout the supporting cells. SOX2 is expressing in both supporting cells and PCP4+ hair cells. **d-f**, SOX10 is expressed throughout the supporting and non-sensory epithelial cells. F-actin-rich circumferential belts were observed in both sensory and non-sensory epithelial. **g**, In day 70 aggregates, PAX2 is expressed in all inner ear organoid epithelia, whereas PAX8 is only expressed in non-sensory epithelia. Scale bars, 100  $\mu$ m (**a, d, e, g**), 25  $\mu$ m (**b, c**), 10  $\mu$ m (**f**).

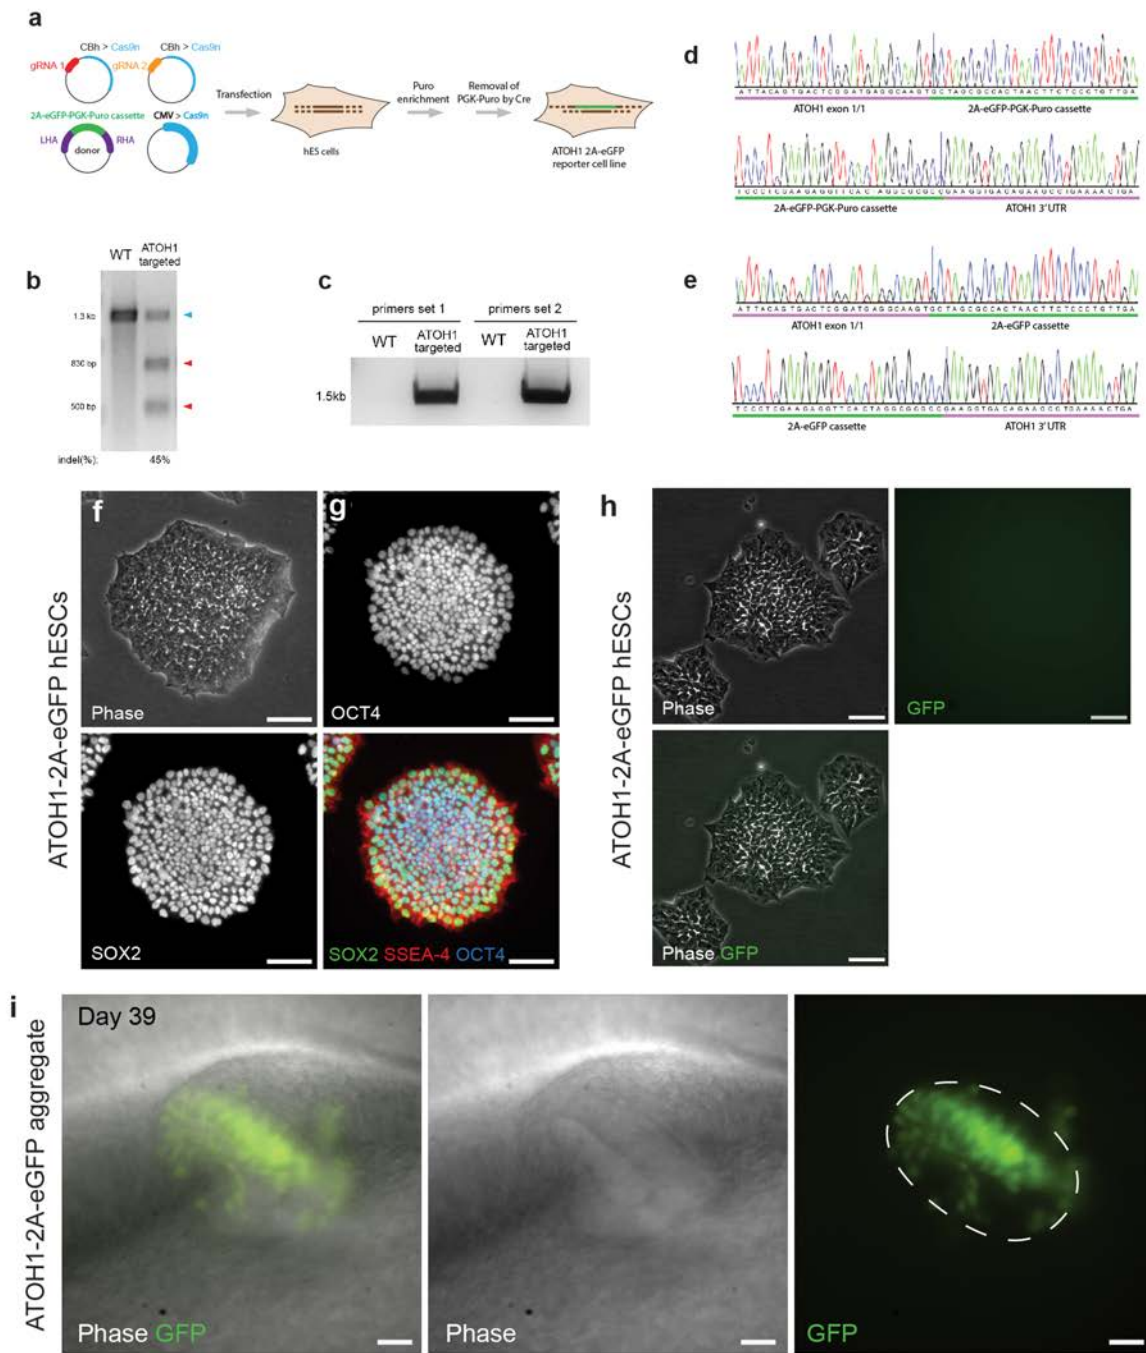

**Supplementary Figure 13: Generation of ATOH1-2A-eGFP cell line using CRISPR/Cas9.** **a**, Workflow of ATOH1-2A-eGFP CRISPR. The vector expressing Cas9n under the control of CMV promoter is used for improved expression level of Cas9n. **b**, Testing of the gRNA pairs with T7 Endonuclease I assay suggests high cleavage activities (indel frequency = 45%) of the gRNA pairs. **c**, **d**, PCR amplification from targeted population of cells using primer sets shown in (Fig. 3a) demonstrates successful 2A-eGFP-PGK-Puro cassette integration (c), which is confirmed by Sanger sequencing at the left and right junctions (d). **e**, Sanger sequencing of the left and right junctions of a clonal cell line derived after Cre recombination demonstrates correct integration of the 2A-eGFP cassette at the ATOH1 locus. The 3' end of the 2A-eGFP cassette shown in lower panel of (e) is a linker region 3' of the LoxP site(s) not affected by Cre recombination. It is therefore identical to the region shown in (d). **f**, **g**, ATOH1-2A-eGFP cells maintained on Vitronectin-N-coated plates in E8 flex medium express markers of primed pluripotent stem cells. **h**, GFP expression is undetectable in undifferentiated ATOH1-2A-eGFP ES cells. **i**, Inner ear organoid derived from ATOH1-2A-eGFP hESCs containing eGFP<sup>+</sup> hair cells on day 39. This is the earliest we observed hair cell induction. Scale bars, 50  $\mu$ m.

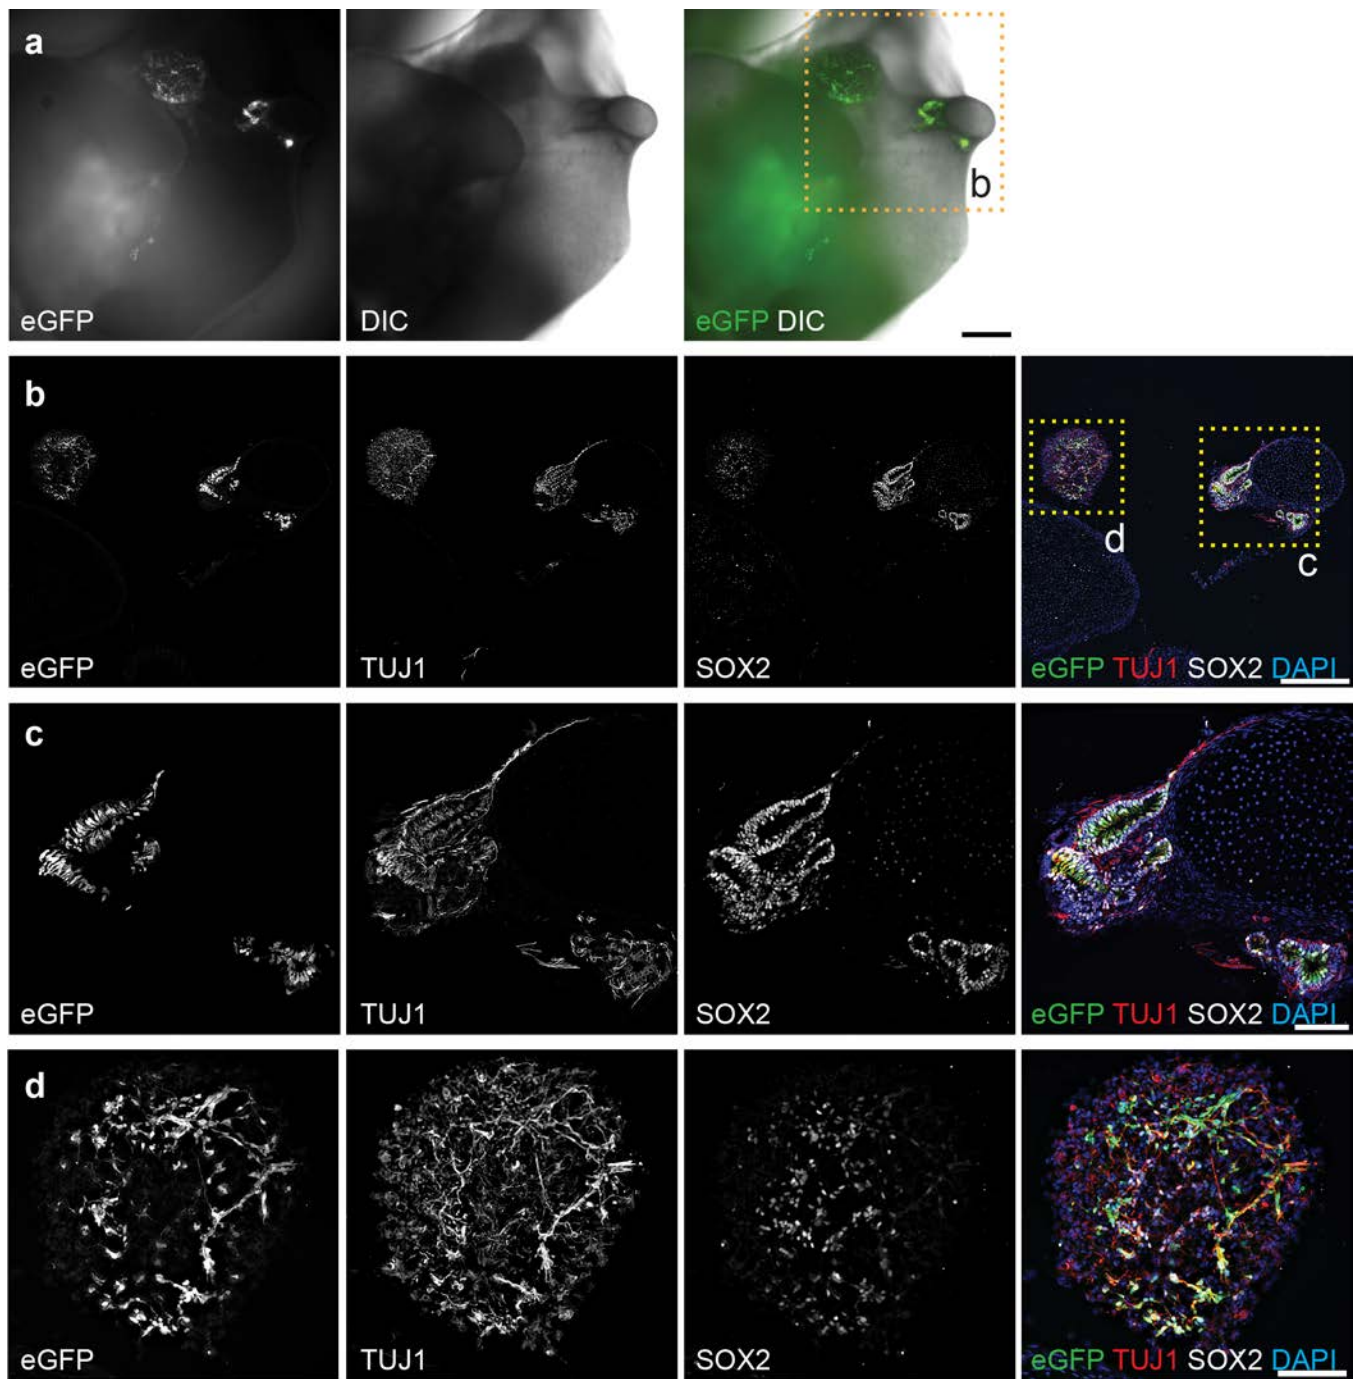

**Supplementary Figure 14: eGFP-positive cells in day 70 cell aggregates.** **a**, Low magnification view of eGFP<sup>+</sup> hair cells and neuron-like cells situated in close proximity within a cell aggregate. **b-d**, High magnification images of SOX2, TUJ1, and eGFP expressing cells in sensory epithelia (**c**) and a neuronal cell cluster (**d**). eGFP<sup>+</sup> hair cells could be distinguished from eGFP<sup>+</sup> neuronal progenitors based on morphology. Note that the TUJ1 antibody labels hESC-derived hair cells. In previous studies, mouse inner ear organoid hair cells were not labeled using the same TUJ1 antibody<sup>2</sup>. Scale bars, 100  $\mu$ m.

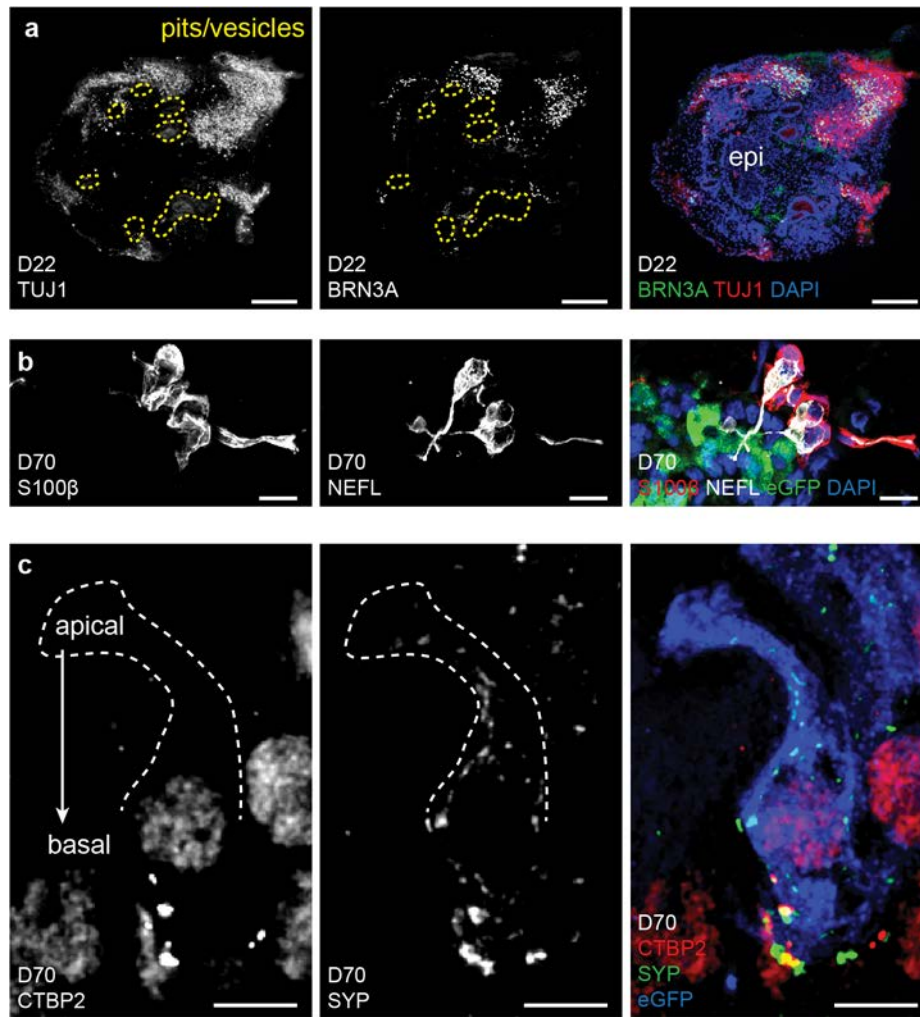

**Supplementary Figure 15: Evidence of neurogenesis and synaptogenesis in inner ear organoid culture.** **a**, On day 22, TUJ1<sup>+</sup> BRNR3A<sup>+</sup> neuroblasts were observed in the mesenchyme surrounding otic pits and vesicles. **b**, High magnification view of S100 $\beta$ <sup>+</sup> Schwann-like cells surrounding neurons and neuronal processes. Lower magnification image is in **Figure 4k**. **c**, High magnification view of CTBP2<sup>+</sup> and SYP<sup>+</sup> puncta localized in the basal region of a eGFP<sup>+</sup> hair cell. Lower magnification image is in **Figure 4m**. Scale bars, 100  $\mu$ m (**a**), 10  $\mu$ m (**b**), and 5  $\mu$ m (**c**).

Chen *et al.* protocol (*Nature*, 2012)

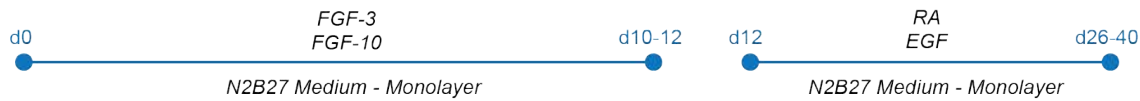

Ronaghi *et al.* protocol (*Stem Cells and Development*, 2014)

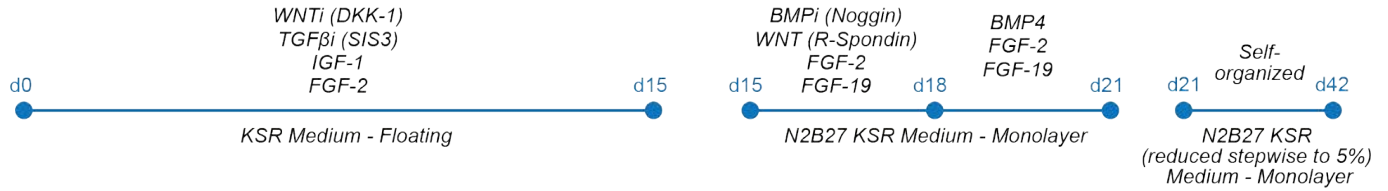

Ealy *et al.* protocol (*PNAS*, 2016)

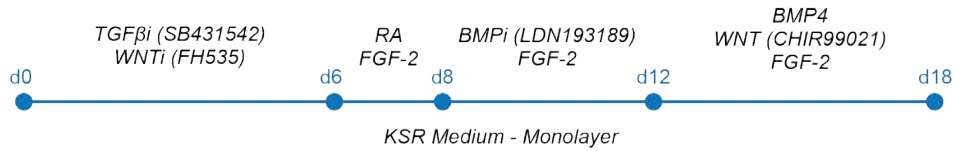

Koehler *et al.* protocol (*Current*)

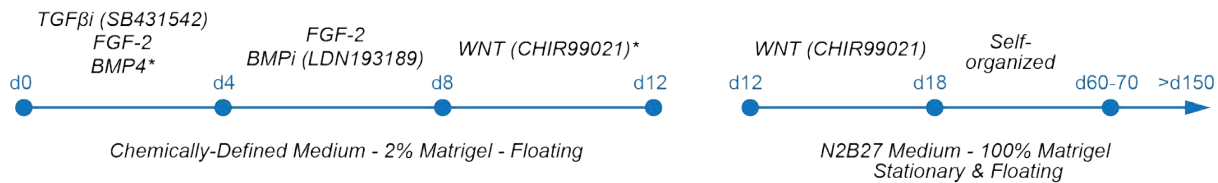

**Supplementary Figure 16: Inner ear induction methods.** Comparison of the current inner ear organoid induction protocol to other recent protocols aimed at inner ear induction from Chen *et al.* (2012), Ronaghi *et al.* (2014), and Ealy *et al.* (2016)<sup>3-5</sup>. Treatments are listed above the timeline, whereas the basal medium and format are listed below. The letter (i) denotes inhibitor. Treatments labeled with an asterisks (\*) are optional and may be cell line dependent. KSR = Knockout Serum Replacement; SIS3 = Selective Inhibitor of Smad3, a partial TGFβ inhibitor; RA = retinoic acid.

## SUPPLEMENTARY TABLES

**Supplementary Table 1. Chemically-Defined Differentiation Medium (CDM)**

| Component                | Supplier  | Cat. No.  | Stock Concentration | Final Concentration | Volume used |
|--------------------------|-----------|-----------|---------------------|---------------------|-------------|
| Ham's F12 GlutaMax       | Gibco     | 31765-035 | -                   | 49% (v/v)           | 100 ml      |
| IMDM GlutaMax            | Gibco     | 31980-030 | -                   | 49% (v/v)           | 100 ml      |
| Chemically-Defined Lipid | Gibco     | 11905-031 | 100x                | 1x                  | 2 ml        |
| BSA                      | Sigma     | A1470     | -                   | 5 mg/ml             | 1 g         |
| Insulin                  | Sigma     | I9278     | 10 mg/ml            | 7 µg/ml             | 140 µl      |
| Transferrin              | Sigma     | T8158     | 20 mg/ml            | 15 µg/ml            | 150 µl      |
| 1-thioglycerol           | Sigma     | M6145     | 11.5 M              | 450 µM              | 8 µl        |
| Normocin                 | Invivogen | Ant-nr-1  | 50 mg/ml            | 100 µg/ml           | 400 µl      |

*Note: This formulation is for 200 mL of medium which should be used for <2 weeks. We sterile filtered the medium before adding Insulin and other factors. A variation of this medium was previously used to generate cerebellar and anterior pituitary organoids<sup>6,7</sup>.*

**Supplementary Table 2. Organoid Maturation Medium (OMM)**

| Component       | Supplier  | Cat. No.  | Stock Concentration | Final Concentration | Volume (50 ml) |
|-----------------|-----------|-----------|---------------------|---------------------|----------------|
| Adv DMEM/F12    | Gibco     | 12491-015 | -                   | 49% (v/v)           | 24.5 ml        |
| Neurobasal      | Gibco     | 21103-049 | -                   | 49% (v/v)           | 24.5 ml        |
| N2 supplement   | Gibco     | 17502-048 | 100x                | 0.5x                | 250 µl         |
| B27 -Vitamin A  | Gibco     | 12587-010 | 50x                 | 0.5x                | 500 µl         |
| GlutaMAX        | Gibco     | 35050-079 | 100x                | 1x                  | 500 µl         |
| Mercaptoethanol | Gibco     | 21985-015 | 55 mM               | 0.1 mM              | 91 µl          |
| Normocin        | Invivogen | Ant-nr-1  | 50 mg/ml            | 100 µg/ml           | 100 µl         |

*Note: This formulation is for 50 mL of medium, which should be used for <2 weeks. This medium is a custom-made hybrid of two media previously used to generate cerebral and gastric organoids<sup>8,9</sup>. B27 without Vitamin A was used to limit the influence of endogenously produced retinoic acid.*

**Supplementary Table 3. qPCR primers**

| Gene         | Sequence                  | Rationale           |
|--------------|---------------------------|---------------------|
| <b>L27</b>   |                           |                     |
| Forward      | CGTGAAGAACATTGATGATGGC    | Housekeeping        |
| Reverse      | GCGATCTTCTTCTTGCCCAT      |                     |
| <b>DLX3</b>  |                           |                     |
| Forward      | TACTCGCCCAAGTCGGAATA      | Non-neural Ectoderm |
| Reverse      | TTCTTGGGCTTCCCATTAC       |                     |
| <b>TFAP2</b> |                           |                     |
| Forward      | TTTCAGCCATGGACCGTCA       | Non-neural Ectoderm |
| Reverse      | GGGAGATTGACCTACAGTGC      |                     |
| <b>CDX2</b>  |                           |                     |
| Forward      | GGGCTCTCTGAGAGGCAGGT      | Extraembryonic      |
| Reverse      | CCTTTGCTCTGCGGTTCTG       |                     |
| <b>BRA</b>   |                           |                     |
| Forward      | TGCTTCCCTGAGACCCAGTT      | Mesendoderm         |
| Reverse      | GATCACTTCTTTCCTTTGCATCAAG |                     |
| <b>OCT4</b>  |                           |                     |
| Forward      | AGTGAGAGGCAACCTGGAGA      | Pluripotency        |
| Reverse      | ACACTCGGACCACATCCTTC      |                     |
| <b>NANOG</b> |                           |                     |
| Forward      | CATGAGTGTGGATCCAGCTTG     | Pluripotency        |
| Reverse      | CCTGAATAAGCAGATCCATGG     |                     |
| <b>EOMES</b> |                           |                     |
| Forward      | CAACATAAACGGACTCAATCCCA   | Mesendoderm         |
| Reverse      | ACCACCTCTACGAACACATTGT    |                     |

**Supplementary Table 4. Antibodies**

| Antibody                               | Host   | Supplier                | Catalog No. | Dilution |
|----------------------------------------|--------|-------------------------|-------------|----------|
| N-Cadherin                             | Mouse  | BD Biosciences          | 610920      | 1:100    |
| SOX10                                  | Mouse  | eBiosciences            | 14-5923-82  | 1:50     |
| E-Cadherin                             | Mouse  | BD Biosciences          | 610181      | 1:250    |
| TFAP2                                  | Mouse  | DSHB                    | 3B5         | 1:5      |
| SOX2                                   | Mouse  | BD Biosciences          | 561469      | 1:100    |
| PAX8                                   | Rabbit | Abcam                   | AB97477     | 1:100    |
| PAX2                                   | Rabbit | Invitrogen              | 716000      | 1:100    |
| Jagged-1 (JAG1)                        | Rabbit | LSBio                   | LSC138530   | 1:50     |
| BRN3C                                  | Mouse  | Santa Cruz              | SC81980     | 1:25     |
| BRN3A                                  | Mouse  | Millipore               | AB5945      | 1:50     |
| MYO7A                                  | Rabbit | Proteus                 | 256790      | 1:100    |
| Acetylated- $\alpha$ -Tubulin (TUBA4A) | Mouse  | Sigma                   | T6793       | 1:100    |
| $\beta$ III-Tubulin (TuJ1)             | Mouse  | Covance                 | MMS-435P    | 1:500    |
| Calretinin (CALB2)                     | Mouse  | Abcam                   | AB702       | 1:100    |
| SPARCL1                                | Mouse  | R&D Systems             | AF2728-SP   | 1:100    |
| PAX6                                   | Mouse  | DSHB                    | PAX6        | 1:5      |
| ANXA4                                  | Mouse  | R&D Systems             | AF4146      | 1:50     |
| PCP4                                   | Rabbit | Sana Cruz               | SC74816     | 1:50     |
| S100 $\beta$                           | Rabbit | Abcam                   | AB52642     | 1:100    |
| espin (ESPN)                           | Rabbit | Gift from James Bartles |             | 1:50     |

*Note: All antibodies used for IHC were previously validated in IHC experiments. Citations can be found on the manufacture's website. Previous validation of the custom-made ESPN antibody in IHC on frozen sections of mouse tissue was performed in Koehler et al 2013<sup>2</sup>.*

**Supplementary Table 5. Comparison of human inner ear induction studies.**

| Study Name                                                                                                           | Chen et al. protocol (Nature, 2012) <sup>3</sup>                  | Ronaghi et al. protocol (Stem Cells Dev., 2014) <sup>4</sup>  | Ealy et al. protocol (PNAS, 2016) <sup>5</sup> | Koehler et al. protocol (Current)        |
|----------------------------------------------------------------------------------------------------------------------|-------------------------------------------------------------------|---------------------------------------------------------------|------------------------------------------------|------------------------------------------|
| Culture format                                                                                                       | 2D                                                                | 3D to 2D                                                      | 2D                                             | 3D                                       |
| Demonstration of non-neural induction                                                                                | (Not shown)                                                       | Yes                                                           | Yes                                            | Yes                                      |
| Analysis of “off-target” lineages included (e.g. mesoderm, neuroectoderm, etc.) to confirm proper lineage commitment | (Not shown)                                                       | Yes                                                           | Yes                                            | Yes                                      |
| Demonstration of pre-placodal or otic-epibranchial progenitor domain induction                                       | (Not shown)                                                       | Yes                                                           | Yes                                            | Yes                                      |
| Expression of hair cell marker genes                                                                                 | Yes                                                               | Yes                                                           | Yes                                            | Yes                                      |
| Multiple hair cell marker genes co-expressed in the same cells                                                       | Yes                                                               | Yes                                                           | (Not shown)                                    | Yes                                      |
| Hair bundle morphology                                                                                               | Disorganized                                                      | Mostly disorganized. Organized morphology “in rare instances” | (Not shown)                                    | Organized                                |
| Electrophysiological responses                                                                                       | Yes                                                               | (Not shown)                                                   | (Not shown)                                    | Yes                                      |
| Presence of supporting cells                                                                                         | (Not shown)                                                       | Yes                                                           | (Not shown)                                    | Yes                                      |
| Correct spatial relationship between supporting cells and hair cells                                                 | (Not shown)                                                       | No                                                            | (Not shown)                                    | Yes                                      |
| Presence of sensory neurons                                                                                          | Yes                                                               | (Not shown)                                                   | (Not shown)                                    | Yes                                      |
| Hair cell or hair cell-like cell generation efficiency                                                               | “A small subset” of cells differentiated from the OEPs population | 1.79% – 5.89%                                                 | (Not shown)                                    | Hair cells present in ~20% of aggregates |

2D, two dimensional. 3D, three dimensional. OEPs: otic epithelial progenitors. Note: In Chen et al. (2012) protocol, the efficiency of OEPs generation is dependent on the cell line, plating density and the degree of cell separation. In Ronaghi et al. (2014) protocol, the 1.79% hair cell-like cell generation efficiency was calculated from cells with mid-level *Atoh1*-nGFP expression ( $19.8\% \times 9.03\% = 1.79\%$ ), which is believed to be “an indicator of a potential hair cell phenotype”. If also considering cells with high *Atoh1*-nGFP expression and cells negative for *Atoh1*-nGFP expression, the hair cell-like cell generation efficiency is 5.89% ( $77.1\% \times 5.24\% + 19.8\% \times 9.03\% + 3.1\% \times 2.08\% = 5.89\%$ ).

## SUPPLEMENTARY DATA

## Annotated plasmid sequence and annotated genomic sequence of ATOH1-2A-eGFP cell lines

### 1. ATOH1-2A-eGFP-PGK-Puro donor plasmid

### Elements:

## ATOH1 left homology arm (LHA)

2A

eGFP

LoxP

## PGK promoter

## Puromycin

PGK polyA

ATOH1 right homology arm (RHA)

pUC19 vector backbone

TCGCGCGTTCCTCGGTGATGACGGGTGAAACACCTCTGACACATGACAGCTCCCGGAGACGGTACACAGCTTGTCTGTAAGCGGATGCCGGGAGCAGACAAGCCCGTCAGGGCGCGTCAGCGGGTGTGGCGGGTGTCTGGGGCTGGCTTAACCTATGCGGCATCAGAGCAGATTGTACTGAGAGTGCACCATATGCGGTGTGAAATACCGCACAGATGCGTAAGGAGAAAATACCGCATCAGGCGCCATTTCGCCATTTCAGGCTGCGCAACTGTTGGGAAGGGCGATCGGTGCGGGCCTCTTCGCTATTACGCCAGCTGGCGAAAGGGGGATGTGCTGCAAGGCGATTAAGTTGGGTAACGCCAGGGTTTTCCAGTCACGACGTTGTAAAACGACGGCCAGTGAATTCGAGCTCGGTACC CGGGGATCC **CCAGCCCCAGCCGCATCATCTCCCGCAACCGCCGCCGCCGCCGCAGCCACCTGCAACTT** **TGCAGGCGAGAGAGCATCCCGTCTACCCGCCTGAGCTGTCCCTCCTGGACAGCACCGACCCACGCGCCT** **GGCTGGCTCCCACTTTGCAGGGCATCTGCACGGCACGCGCCGCCAGTATTTGCTACATTCCCCGGAGC** **TGGGTGCCTCAGAGGCCGCTGCGCCCCGGGACGAGGTGGACGGCCGGGGGGAGCTGGTAAGGAGGAG** **CAGCGGCGGTGCCAGCAGCAGCAAGAGCCCCGGGCCGGTGAAAGTGCGGGAACAGCTGTGCAAGCTGA** **AAGGCGGGGTGGTGGTAGACGAGCTGGGCTGCAGCCGCCAACGGGCCCTTCCAGCAAACAGGTGAAT** **GGGGTGCAGAAGCAGAGACGGCTAGCAGCCAACGCCAGGGAGCGGCGCAGGATGCATGGGCTGAACC** **ACGCCTTCGACCAGCTGCGCAATGTTATCCCGTCGTTCAACAACGACAAGAAGCTGTCCAAATATGAGAC** **CCTGCAGATGGCCCAAATCTACATCAACGCCTTGTCAGAGCTGCTACAAACGCCAGCGGAGGGGAACA** **GCCACCGCCGCCCTCCAGCCTCCTGCAAAAGCGACCACCACCACCTTCGCACCGCGGCCTCCTATGAAGG** **GGGCGCGGGCAACGCGACCGCAGCTGGGGCTCAGCAGGCTTCGGAGGGAGCCAGCGGCCGACCCCG** **CCCGGGAGTTGCCGGACTCGCTTCTCAGCCCCAGCTTCTGCGGGAGGGTACTCGGTGCAGCTGGACGC** **TCTGCACTTCTCGACTTTCGAGGACAGCGCCCTGACAGCGATGATGGCGCAAAAGAATTTGTCTCCTTCT** **CTCCCCGGGAGCATCTTGACAGCCAGTGCAGGAGGAAAACAGCAAACTTCGCCTCGGTCCCACAGAAGC** **GACGGGGAATTTTCCCCCATTCCTTACAGTGA** **CTCGGATGAGGCAAGTGCTAGC** **ggcactaactctccctgtt** **gaaacaagcaggggatgtcgaagagaatccccgggcca** **atggtgagcaagggcgaggagctgttcaccggggtggtgccatcctggtcgagctggac** **ggcgacgtaaacggccacaaggtcagcgtgtccggcgagggcgagggcgatgccacctacggcaagctgacctgaagttcatctgcaccaccggca** **agctgccgtgcccggcccaccctcgtgaccaccctgacctacggcgtgcagtgcttcagccgtacccccgaccacatgaagcagcagcactcttcaag** **tccgcatgcccgaaggctacgtccaggagcgcaccatcttctcaaggacgacggcaactacaagaccgcgcgaggtgaagttcgagggcgacac** **cctggtgaaccgcatcgagctgaaggcatcgactcaaggaggacggcaacatcctggggcacaagctggagtacaactacaacagccacaacgtct** **atatcatggcgacaagcagaagaacggcatcaaggtgaacttcaagatccgccacaacatcgaggacggcagcgtgcagctcgccgaccactacca** **gcagaacacccccatcggcgacggccccgtgctgctgccgacaaccactacctgagcaccacagctccgccctgagcaaagaccccaacgagaagcg** **cgatcacatggctcgtgaggttcgtgacccgccgcccgggatcactctcggcacgtgacgagctgtacaagtaa** **GAATTCCgatcatattcaataaccctt** **aatataacttcgtataatgtatgtctatacgaagttat** **taggtctgaagaggagttacgtccagccaagcttaggatctcgacctcgaaattctaccgggtaggg** **gaggcgcttttcccaaggcagctcggagcatgcgctttagcagccccgctgggcacttggcgctacacaagtggcctctggcctcgcacacattccacatcc** **accggtaggcgccaaccggctccgttctttgttgcccccttcgcgccaccttctactcctcccctagtcaggaaagttccccccgccccgcagctcgctcgt** **gcaggacgtgacaaatggaagtagcacgtctcactagctcgtgcagatggacagcaccgtgagcaatggaagcgggtaggcctttggggcagcggc** **caatagcagctttgctccttcgcttctgggtcagaggctgggaaggggtgggtccggggggcgggctcaggggcgggctcaggggcggggcgcc** **cgaaggctcctcggaggccccggaattctgcacgcttcaaaagcgcacgtctgcgcgctgttctccttctcctcatctccgggcctttcgacctgcatcatcta** **gatctcgagcagctgaagcttacc** **atgaccgagtacaagcccacggtgcgcctcgccaccgcgacgacgtccccaggggccgtacgcaccctcgccgc** **cgcgcttcgcgactaccccgccacgcgcacacacgctcgatccggaccgcccacatcgagcgggtcaccgagctgcaagaactcttctcacgcgcgtcgg** **gctcgacatcgggaagggtgtgggtcgcgagcagcgcgcgcgcggtggcggtctggaccacgcggagagcgtcgaagcggggggcggtgttcgccgag**

atcgccccgcgcatggccgagttgagcgggtcccggtggccgcgcagcaacagatggaaggcctcctggcgccgcaccggcccaaggagcccggt  
ggttcctggccaccgctcggcgctcgcgccgaccaccagggcaagggctcggcagcgccgctcgtgctccccggagtgaggcgccgagcgcgccgg  
gggtcccgccctcctggagacctccgcgccccgcaacctccctctacgagcggtcgggttcaccgtaaccgcccagctcgagggtcccgaaggaccg  
cgacctgggtcatgaccgcaagcccggtgcctgaacgccccacgaccgcagcgccccgaccgaaaggagcgcacgacccccatgcatcgtg  
atatcagatccccgggaatgcagaaattgatgatctattaaacaataaagatgtccactaaaatggaagttttcctgtcatactttgtaagaagggtgagaac  
agagtacctacatttgaatggaaggattggagctacgggggtgggggtgggggtgggattagataaatgcctgctcttactgaaggctcttactattgcttat  
gataatgtttcatagttggatacataatttaaacaagcaaaaaccaaattaagggccagctcattcctccactcatgatctatagatctatagatctctcgtggg  
atcattgttttctcttgattcccactttgtggttctaagtactgtggttccaaatgtgtcagtttcatagcctgaagaacgagatcagcagcctctgttccacataca  
cttcattctcagtatgttttgccaagttctaattccatcagaagctgtgtcgagatccggaacccttaataaacttcgtataatgtatgctatacgaagttattaggtc  
cctcgaagagaggttactaGGCGCGCCGAAGGTGACAGAAGCCTGAAAACCTGAGACAGAAACAAAACCTGCCCTTTC  
CCAGTGCGCGGGAAGCCCCGCGGTTAAAGATCCCCGCACCCTTTAATTTTTGCTCTGCGATGGTCGTTGT  
TTAGCAACGACTTGGCTTCAGATGGCAGCTACATTTGATGGTTTGCAAATGCCGCCGCTGTTCCAAACTTC  
CTACGGTCCATATTGTTTGATGAAAACCTTTCTGTTAAAATTGTGTCTTTCCGCCACCTTCTGCTCCCCCT  
TTAGATAGATACGGTATAATTGTAGGTACCCGTATATGGCATCATTATTCTAGTTCCCTGCTGCCAATACGC  
TGCTAAAACGTGCGATCTTCTCTGTCACTGGTTTGGGTTTAATTTATTTTACGCCCTGGGCATCCATCCTTG  
TGTGTTGCGCACTCAAGTGTGGGAGATTTAGTCTTCCGAAGTTGTTTTCCAAAATGCACAATGAAACGCAA  
AATTAGTGCTTCCAAAGTGATAACTTTTGAATGTTAGAAAACAAGAACTTTAAGGTTTATAT  
ATTGTATAAACATACCCAGTATGTGCATCCGATCGCGAGAACGTTGGCGTCTTTTAGGAACTCCGCGCA  
CGCACTTTATCAGCCGCTGCTGCGGTGGTGGCTCCAGGAGAACTCAACTGCCAATTGCAGACCAGTTTT  
TTTTTTTTTAAACACAGCCACTTATAATTCTTAAGCTCTTTGCAAATGTTTGTTTAAAAAATGAAAAATTAAAA  
AAAATCTAGTAGTGTCAAACGCATTTGGTCAATTTTATTTTGCTTTGTTAATATTAGAAAACCTATTATTATT  
GTTTGCTACCATTTCTACTTATCTTGATTCAATTTTTTACGTTTTCTACTCGAGATCATTTTATTTAATTTAGC  
AAAGCCAACCTGCCCTTGTTAATGTATTTTGTGTTTGCAAATGATTAAAATAAATGTGAAAAGAAGCCTTTGT  
CACTTATTCCTTGAGTTCTAGAGTCGACCTGCAGGCATGCAAGCTTGCGTAATCATGGTCATAGCTGTTT  
CCTGTGTGAAATTGTTATCCGCTCACAATTCACACAACATACGAGCCGGAAGCATAAAGTGTAAGCCTG  
GGGTGCCTAATGAGTGAGCTAACTCACATTAATTGCGTTGCGCTCACTGCCCGCTTTCCAGTCGGGAAAC  
CTGTCTGTGCCAGCTGCATTAATGAATCGGCCAACGCGCGGGGAGAGGCGGTTTGCCTATTGGGCGCTCT  
TCCGCTTCTCGCTCACTGACTCGCTGCGCTCGGTGTTTGGCTGCGGCGAGCGGTATCAGCTCACTCA  
AAGGCGGTAATACGGTTATCCACAGAATCAGGGGATAACGCAGGAAAGAACATGTGAGCAAAAGGCCAG  
CAAAAGGCCAGGAACCGTAAAAAGGCCGCGTTGCTGGCGTTTTTCCATAGGCTCCGCCCCCCTGACGAG  
CATCACA AAAATCGACGCTCAAGTCAGAGGTGGCGAAACCCGACAGGACTATAAAGATACCAGGCGTTTC  
CCCCTGGAAGCTCCCTCGTGCGCTCTCCTGTTCCGACCCTGCCGCTTACCGGATACCTGTCCGCCTTTCT  
CCCTTCGGGAAGCGTGGCGCTTTCTCATAGCTCACGCTGTAGGTATCTCAGTTCGGTGTAGGTGCTTCGC  
TCCAAGCTGGGCTGTGTGCACGAACCCCCCGTTACAGCCCGACCGCTGCGCCTTATCCGGTAACCTATCGT  
CTTGAGTCCAACCCGTAAGACACGACTTATCGCCACTGGCAGCAGCCACTGGTAACAGGATTAGCAGA  
GCGAGGTATGTAGGCGGTGCTACAGAGTTCTTGAAGTGGTGGCCTAACTACGGCTACACTAGAAGAACA  
GTATTTGGTATCTGCGCTCTGCTGAAGCCAGTTACCTTCGGAAAAAGAGTTGGTAGCTCTTGATCCGGCA  
AACAAACCACCGCTGGTAGCGGTGGTTTTTTTTGTTTGCAAGCAGCAGATTACGCGCAGAAAAAAGGATC  
TCAAGAAGATCCTTTGATCTTTTCTACGGGGTCTGACGCTCAGTGGAACGAAACTCACGTTAAGGGATT  
TGGTCATGAGATTATCAAAAAGGATCTTACCTAGATCCTTTTAAATTA AAAATGAAGTTTTAAATCAATCTA  
AAGTATATATGAGTAACTTGGTCTGACAGTTACCAATGCTTAATCAGTGAGGCACCTATCTCAGCGATCT  
GTCTATTTTCGTTTATCCATAGTTGCCTGACTCCCCGCTCGTGTAGATAACTACGATACGGGAGGGCTTACCA  
TCTGGCCCCAGTGCTGCAATGATACCGCGAGACCCACGCTCACCGGCTCCAGATTTATCAGCAATAAACC  
AGCCAGCCGGAAGGGCCGAGCGCAGAAGTGGTCTGCAACTTTATCCGCTCCATCCAGTCTATTAATTG  
TTGCCGGGAAGCTAGAGTAAGTAGTTCGCCAGTTAATAGTTTGCGCAACGTTGTTGCCATTGCTACAGGC  
ATCGTGGTGTACGCTCGTCGTTTGGTATGGCTTCATTACGCTCCGTTCCCAACGATCAAGGCGAGTTA  
CATGATCCCCCATGTTGTGCAAAAAGCGGTTAGCTCCTTCGGTCTCCGATCGTTGTCAGAAGTAAGTT  
GGCCGCAGTGTTATCACTCATGGTTATGGCAGCACTGCATAATTCTCTTACTGTCATGCCATCCGTAAGAT  
GCTTTTCTGTGACTGGTGAGTACTCAACCAAGTCATTCTGAGAATAGTGTATGCGGCGACCGAGTTGCTCT  
TGCCCGGCGTCAATACGGGATAATACCGCGCCACATAGCAGAACTTTAAAAGTGCTCATCATTGGAAAAC  
GTTCTTCGGGGCGAAAACCTCTCAAGGATCTTACCGCTGTTGAGATCCAGTTCGATGTAACCCACTCGTGC  
ACCCAACCTGATCTTCAGCATCTTTTACTTTACCAGCGTTTCTGGGTGAGCAAAAACAGGAAGGCCAAAATG  
CCGCAAAAAGGGGAATAAGGGCGACACGGAAATGTTGAATACTCATACTCTTCTTTTTTCAATATTATTGAA  
GCATTTATCAGGGTTATTGTCTCATGAGCGGATACATATTTGAATGTATTTAGAAAAATAAACAATAAGGGG  
TTCCGCGCACATTTCCCCGAAAAGTGCCACCTGACGTCTAAGAAACCATTATTATCATGACATTAACCTAT  
AAAAATAGGCGTATCACGAGGCCCTTTCGTC

## 2. Genomic sequence of the homozygous/bi-allelic ATOH1-2A-eGFP cell line at the ATOH1 locus

Elements:

ATOH1 exon 1/1 without the stop codon

2A

eGFP

LoxP

.....  
CTTTGATTGGCTGCTCGCACGCGCCTGCCGCGCCCTCCATTGGCTGAGAAGACACGCGACCGGGCGCG  
AGGAGGGGGTTGGGAGAGGAGCGGGGGGAGACTGAGTGGCGCGTGCCGCTTTTTAAAGGGGCGCAGC  
GCCTTCAGCAACCGGAGAAGCATAGTTGCACGCGACCTGGTGTGTGATCTCCGAGTGGGTGGGGGAGG  
GTCGAGGAGGGAAAAAATAAGACGTTGCAGAAGAGACCCGAAAGGGCCTTTTTTTTGGTTGAGCTG  
GTGTCCAGTGCTGCCTCCGATCCTGAGCCTCCGAGCCTTTGCAGTGCAATGTCCCGCCTGCTGCATGC  
AGAAGAGTGGGCTGAAGTGAAGGAGTTGGGAGACCACCATCGCCAGCCCCAGCCGCATCATCTCCCGCA  
ACCGCCGCGCGCGCGCAGCCACCTGCAACTTTGCAGGCGAGAGAGCATCCCGTCTACCCGCCTGAGC  
TGTCCTCCTGGACAGCACCGACCCACGCGCCTGGCTGGCTCCCACTTTGCAGGGCATCTGCACGGCAC  
GCGCCGCCAGTATTTGCTACATTCCCCGGAGCTGGGTGCCTCAGAGGCCGCTGCGCCCCGGGACGAG  
GTGGACGGCCGGGGGGAGCTGGTAAGGAGGAGCAGCGGCGGTGCCAGCAGCAGCAAGAGCCCCGGGC  
CGGTGAAAGTGCGGGAACAGCTGTGCAAGCTGAAAGGCGGGGTGGTGGTAGACGAGCTGGGCTGCAGC  
CGCCAACGGGCCCCCTTCAGCAAACAGGTGAATGGGGTGCAGAAGCAGAGACGGCTAGCAGCCAACGC  
CAGGGAGCGGCGCAGGATGCATGGGCTGAACCACGCCTTCGACCAGCTGCGCAATGTTATCCCGTCGTT  
CAACAACGACAAGAAGCTGTCCAAATATGAGACCCTGCAGATGGCCCAAATCTACATCAACGCCTTGTCC  
GAGCTGCTACAAACGCCCAGCGGAGGGGAACAGCCACCGCCGCCTCCAGCCTCCTGCAAAAGCGACCA  
CCACCACCTTCGCACCGCGGCCTCCTATGAAGGGGGCGCGGGCAACGCGACCGCAGCTGGGGCTCAGC  
AGGCTTCCGGAGGGAGCCAGCGGCCGACCCCGCCCGGGAGTTGCCGGAATCGCTTCTCAGCCCCAGCT  
TCTGCGGGAGGGTACTCGGTGCAGCTGGACGCTCTGCACTTCTCGACTTTCGAGGACAGCGCCCTGACA  
GCGATGATGGCGCAAAAGAATTTGTCTCCTTCTCTCCCCGGGAGCATCTTGCAGCCAGTGCAGGAGGAAA  
ACAGCAAACTTCGCCTCGGTCCCACAGAAGCGACGGGGAATTTCCCCCATTCCCATTACAGTGACTC  
GGATGAGGCAAGTGCTAGCgccaactaacttctccctgttgaacaagcaggggatgtcgaagagaatcccgggccaatggtgagcaaggg  
cgaggagctgttaccgggggtggtgccatcctggtcgagctggacggcgacgtaaacggccacaagttcagcgtgtccggcgagggcgagggcgatg  
ccacctacggcaagctgacctgaagttcatctgcaccaccggcaagctgccgtgacctggccaccctcgtgaccacctgacctacggcgtgcagt  
cttcagccgtaccccgaccacatgaagcagcagcacttctcaagtcgccatgccgaaggctacgtccaggagcgcaccatcttctcaaggacgac  
ggcaactacaagaccgcgcggaggtgaagttcgagggcgacacctggtgaaccgcacatcgagctgaagggcatcgacttcaaggaggacggcaac  
atcctggggcacaagctggagtacaactacaacagccacaacgtctatatcatggccgacaagcagaagaacggcatcaaggtgaactcaagatccg  
ccacaacatcgaggacggcagcgtgcagctgcgcgaccactaccagcagaacacccccatcggcgacggccccgtgtctgtgcccgacaaccactac  
ctgagcaccacagtcggccctgagcaaaagaccccaacgagaagcgcgatcacatggctcctgctgagttcgtgaccgccgcccgggatcactctcggcatg  
gacgagctgtacaagtaaGAATTCcgatcatattcaataacccttaataaacttcgtataatgtatgctatcgaagttataggtccctcgaagaggttca  
ctaGGGCGCGCCGAAGGTGACAGAAGCCTGAAAACCTGAGACAGAAACAAAACCTGCCCTTTCCCAGTGCGCG  
GGAAGCCCCGCGGTTAAAGATCCCCGCACCCTTTAATTTTTGCTCTGCGATGGTTCGTTGTTTAGCAACGA  
CTTGGCTTCAGATGGCAGCTACATTTGATGGTTTGCAAATGCCGCCGCTGTTCCAAACTTCTACGGTCCA  
TATTGTTTGATGAAAACTTTCTGTTAAATTTGTGTCCTTTCCGCCACCTTCTGCTCCCCCTTTAGATAGAT  
ACGGTATAATTGTAGGTACCCGTATATGGCATCATTATTCTAGTTCCTGCTGCCAATACGCTGCTAAAAC  
GTCGCATCTTCTGTCACTGTTTTGGGTTTAAATTTATTTTACGCCCTGGGCATCCATCCTTGTGTGTTGC  
GCACTCAAGTGTGGGAGATTTAGTCTTCCGAAGTTGTTTTCCAAAATGCACAATGAAACGCAAAATTAGTG  
CTTCCAAAGTGGATAACTTTTGAATTTGTTAGAAAACAAGAACTTTAAGGTTTATATATTGTATAA  
ACATACCCAGTATGTGCATCCGATCGCGAGAACGTTGGCGTCTTTTAGGAAACTCCGCGCACGCACTTTA  
TCAGCCGCTGCTGCGGTGGTGGCTCCAGGAGAACTCAACTGCCAATTGCAGACCAGTTTTTTTTTTTTTA  
AACACAGCCACTTATAATTCTTAAGCTCTTTGCAAATGTTTGTAAAAAATGAAAAATTAATAAATCTAG  
TAGTGTCAAACGCATTTGGTCAATTTTATTTTGTCTTGTAAATATTAGAAAACCTATTTATTATTGTTTGCTAC  
CATTTCTACTTATCTTGATTCATTTTTTACGTTTTCTACTCGAGATCATTTTATTTTAATTTAGCAAAGCCAAC  
TGCCCTTGTTAATGTATTTTGTGTTTGCAAATGATTAAATAAATGTGAAAAGAAGCCTTTTGTCACTTATTC  
CTTGAGTATAACTACTGAAAACAATTTTCAAATGAATGACTTTGAAGAATTGAGTTAAGTCTTCTATTCAATG

TCATTTATGCGATCTTACAGTTTTGAAGAAAAATGTTGTAACTTGGTGCCTTCAGGTAGTATCAAAACCCC  
TTCAAAGAAAAGCACTCAAGTCAATAATTAAATTGTGAGATAAACTTCTTCCAAATTTGCAGCACAGTTTT  
GCCTCTTTGATGGCCAGGATCTT

.....

## SUPPLEMENTARY VIDEO LEGENDS

**Supplementary Video 1: Otic vesicles and epidermal core on day 35.** Wholemount aggregate immunostained with antibodies for ECAD (green) and KRT5 (red). The sample was cleared using the ScaleS protocol (see **Methods**) and imaged using confocal microscopy. The central ECAD<sup>+</sup> structure is also KRT5<sup>+</sup>, indicating an epidermal keratinocyte fate. Note the diverse size and morphology of the ECAD<sup>+</sup> otic vesicles. We also noted the presence of pore-like structures in the epidermal epithelium. Refer to **Fig. 2g-h** and **Supplementary Fig. 11** for additional characterization of similar day 35 specimens.

**Supplementary Video 2: Multi-chambered inner ear organoid viewed through the surface of a day 48 aggregate using DIC imaging.** The organoid has an epithelium and lumen that is clearly distinguishable from the surrounding mesenchyme. The two chambers of the organoid appear to be connected via a duct-like structure. A nodule of cartilage is visible in the upper right-hand corner of the frame at the beginning of the video. Refer to **Fig. 2j** to see this specimen in the context of the entire aggregate.

**Supplementary Video 3: Inner ear organoids with ATOH1-2A-eGFP<sup>+</sup> hair cells (day 100 live cell imaging).** The specimen represents three separate inner ear organoids or three chambers of a single inner ear organoid. Note the elongated morphology of hair cells as well as the tight Image segmentation was used to generate an estimation of ~716 eGFP<sup>+</sup> hair cells in this specimen.

**Supplementary Video 4: Multi-chambered inner ear organoid with ATOH-2A-eGFP<sup>+</sup> hair cells in flat-mount preparation (day 100).** On day 75, an inner ear organoid containing eGFP<sup>+</sup> cells was dissected from an aggregate and placed in a Matrigel droplet in a 24-well plate. After 25 days, the organoid retained eGFP<sup>+</sup> cells and had adhered to the culture plate bottom. Part 1: Phalloidin staining revealed F-actin-rich cell junctions on the luminal surface of multiple chambers in the flattened organoid. Part 2: High magnification imaging of chamber 2 reveals eGFP<sup>+</sup> cells with hair cell-like morphology and espin (ESPN)<sup>+</sup> stereocilia bundle-like structures protruding into the lumen.

**Supplementary Video 5: Inner ear organoid with ESPN<sup>+</sup> eGFP<sup>+</sup> hair cells with innervation by NEFH<sup>+</sup> sensory-like neurons.** The neuronal morphologies observed are highlighted to demonstrate the mix of unipolar and bipolar neurons found in inner ear organoid culture.

## REFERENCES

1. Groves, A. K. & Fekete, D. M. Shaping sound in space: the regulation of inner ear patterning. *Development* **139**, 245–257 (2012).
2. Koehler, K. R., Mikosz, A. M., Molosh, A. I., Patel, D. & Hashino, E. Generation of inner ear sensory epithelia from pluripotent stem cells in 3D culture. *Nature* **500**, 217–221 (2013).
3. Chen, W. *et al.* Restoration of auditory evoked responses by human ES-cell-derived otic progenitors. *Nature* **490**, 278–282 (2012).
4. Ronaghi, M. *et al.* Inner Ear Hair Cell-Like Cells from Human Embryonic Stem Cells. *Stem Cells and Development* **23**, 1275–1284 (2014).
5. Ealy, M., Ellwanger, D. C., Kosaric, N., Stapper, A. P. & Heller, S. Single-cell analysis delineates a trajectory toward the human early otic lineage. *PNAS* **113**, 8508–8513 (2016).
6. Muguruma, K., Nishiyama, A., Kawakami, H., Hashimoto, K. & Sasai, Y. Self-Organization of Polarized Cerebellar Tissue in 3D Culture of Human Pluripotent Stem Cells. *Cell Rep* **10**, 537–550 (2015).
7. Suga, H. *et al.* Self-formation of functional adenohypophysis in three-dimensional culture. *Nature* **480**, 57–62 (2011).
8. McCracken, K. W. *et al.* Modelling human development and disease in pluripotent stem-cell-derived gastric organoids. *Nature* **516**, 400–404 (2014).
9. Lancaster, M. A. *et al.* Cerebral organoids model human brain development and microcephaly. *Nature* **501**, 373–379 (2013).
